# Supplementary material for: Tracking the global flows of atmospheric moisture and associated uncertainties
Source: Copernicus journal article supplement (doi:10.5194/hess-24-2419-2020), 2020-05-12
Supplement: Supplementary file 1 [file hess-24-2419-2020-supplement.pdf]

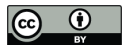

*Supplement of*

## **Tracking the global flows of atmospheric moisture and associated uncertainties**

**Obbe A. Tuinenburg and Arie Staal**

*Correspondence to:* Obbe A. Tuinenburg (o.a.tuinenburg@uu.nl)

The copyright of individual parts of the supplement might differ from the CC BY 4.0 License.

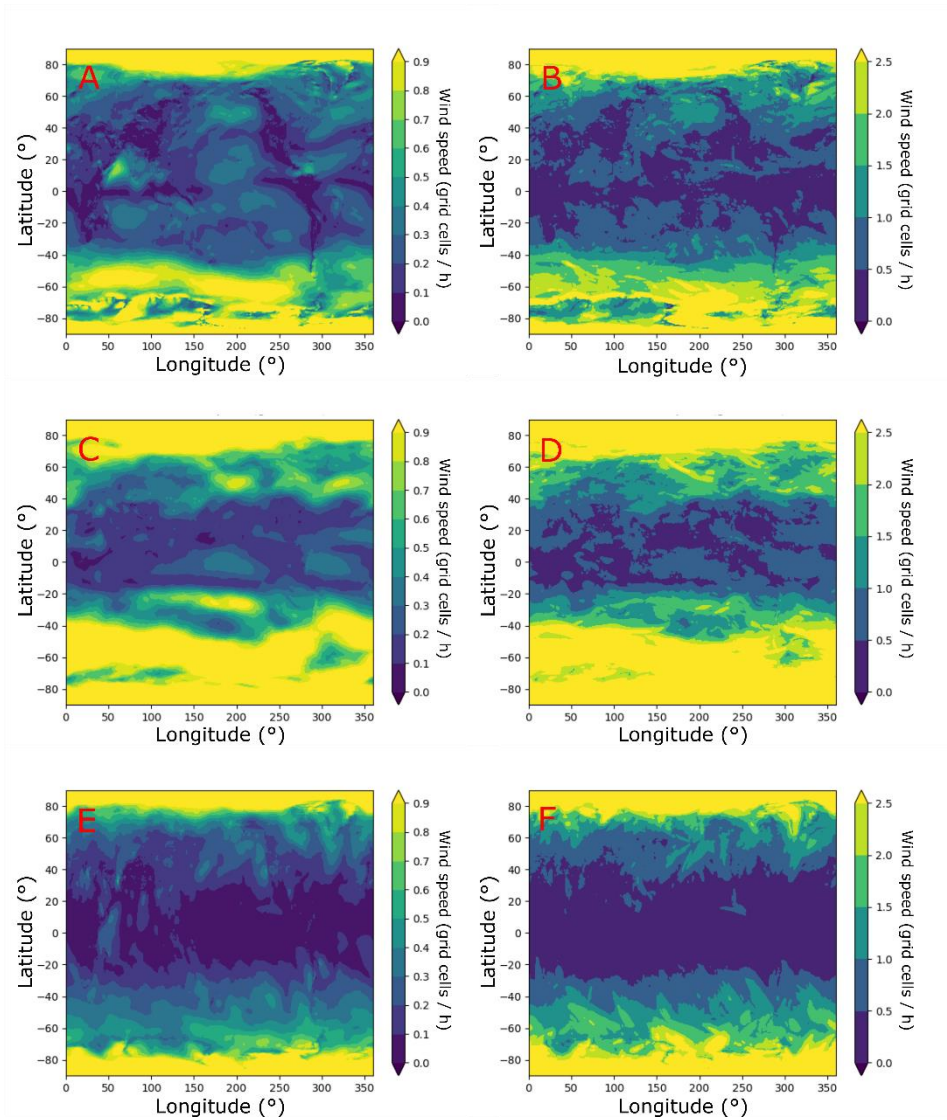

**Figure S1: Eastward wind speeds in July 2012 across the globe, given in ERA5 grid cells / h (Courant number). A) Mean eastward wind speeds at 900 hPa; B) Maximum eastward wind speeds at 900 hPa; C) Mean eastward wind speeds at 500 hPa; D) Maximum eastward wind speeds at 500 hPa; E) Mean eastward wind speeds, vertically integrated divided by the precipitable water; F) Maximum eastward wind speeds, vertically integrated divided by the precipitable water.**

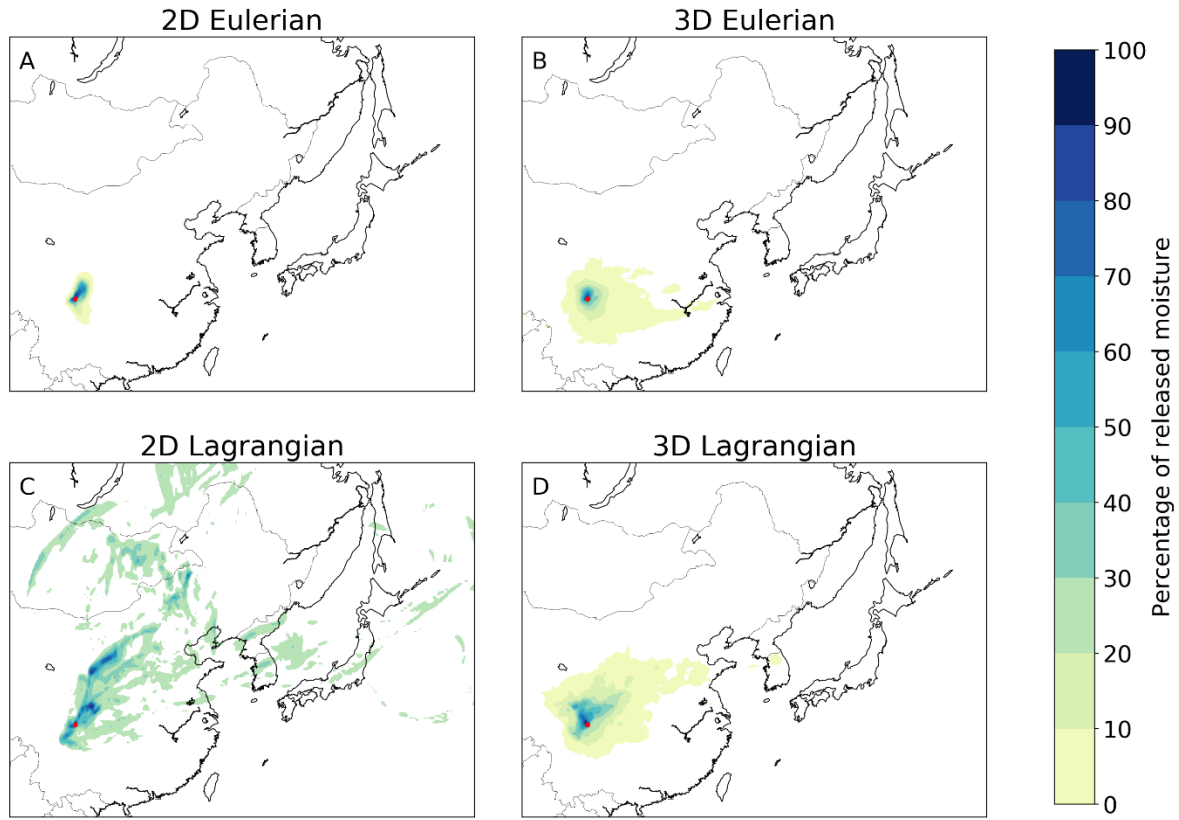

**Figure S2: Different footprints of moisture releases from Chengdu in July 2012 in two-dimensional and three-dimensional Eulerian and Lagrangian models. A) Two-dimensional Eulerian, with a mean latitudinal moisture flow of  $0.6^{\circ}$  in a northerly direction and mean longitudinal flow of  $0.6^{\circ}$  in an easterly direction; B) Three-dimensional Eulerian, with a mean latitudinal moisture flow of  $0.1^{\circ}$  in a northerly direction and mean longitudinal flow of  $0.9^{\circ}$  in an easterly direction; C) Two-dimensional Lagrangian, with a mean latitudinal moisture flow of  $6.5^{\circ}$  in a northerly direction and mean longitudinal flow of  $5.6^{\circ}$  in an easterly direction; D) Three-dimensional Lagrangian, with a mean latitudinal moisture flow of  $1.8^{\circ}$  in a northerly direction and mean longitudinal flow of  $1.7^{\circ}$  in an easterly direction.**

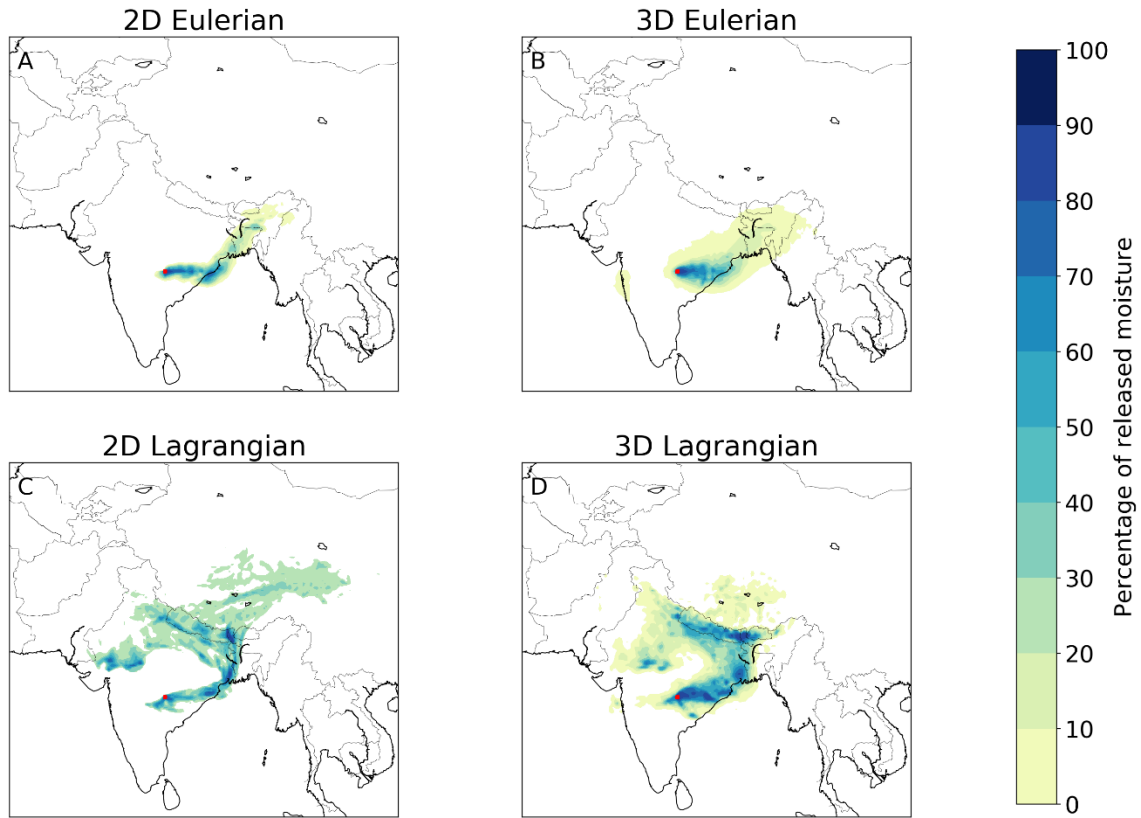

**Figure S3: Different footprints of moisture releases from Nagpur in July 2012 in two-dimensional and three-dimensional Eulerian and Lagrangian models. A) Two-dimensional Eulerian, with a mean latitudinal moisture flow of  $1.3^\circ$  in a northerly direction and mean longitudinal flow of  $5.7^\circ$  in an easterly direction; B) Three-dimensional Eulerian, with a mean latitudinal moisture flow of  $0.6^\circ$  in a northerly direction and mean longitudinal flow of  $3.8^\circ$  in an easterly direction; C) Two-dimensional Lagrangian, with a mean latitudinal moisture flow of  $5.5^\circ$  in a northerly direction and mean longitudinal flow of  $4.8^\circ$  in an easterly direction; D) Three-dimensional Lagrangian, with a mean latitudinal moisture flow of  $4.7^\circ$  in a northerly direction and mean longitudinal flow of  $3.6^\circ$  in an easterly direction.**



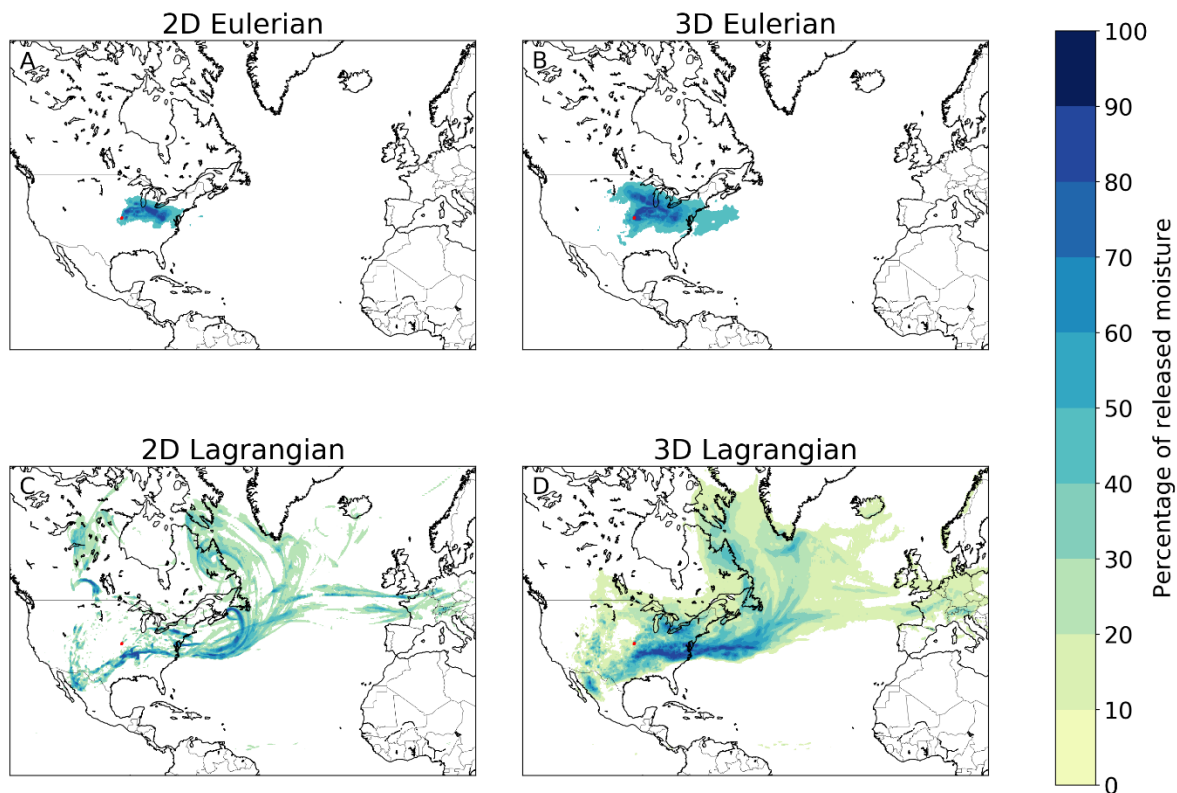

**Figure S4: Different footprints of moisture releases from Central Kansas in July 2012 in two-dimensional and three-dimensional Eulerian and Lagrangian models. A) Two-dimensional Eulerian, with a mean latitudinal moisture flow of  $1.8^\circ$  in a northerly direction and mean longitudinal flow of  $8.5^\circ$  in an easterly direction; B) Three-dimensional Eulerian, with a mean latitudinal moisture flow of  $1.3^\circ$  in a southerly direction and mean longitudinal flow of  $7.1^\circ$  in an easterly direction; C) Two-dimensional Lagrangian, with a mean latitudinal moisture flow of  $5.4^\circ$  in a northerly direction and mean longitudinal flow of  $14.4^\circ$  in an easterly direction; D) Three-dimensional Lagrangian, with a mean latitudinal moisture flow of  $4.1^\circ$  in a northerly direction and mean longitudinal flow of  $15.6^\circ$  in an easterly direction.**

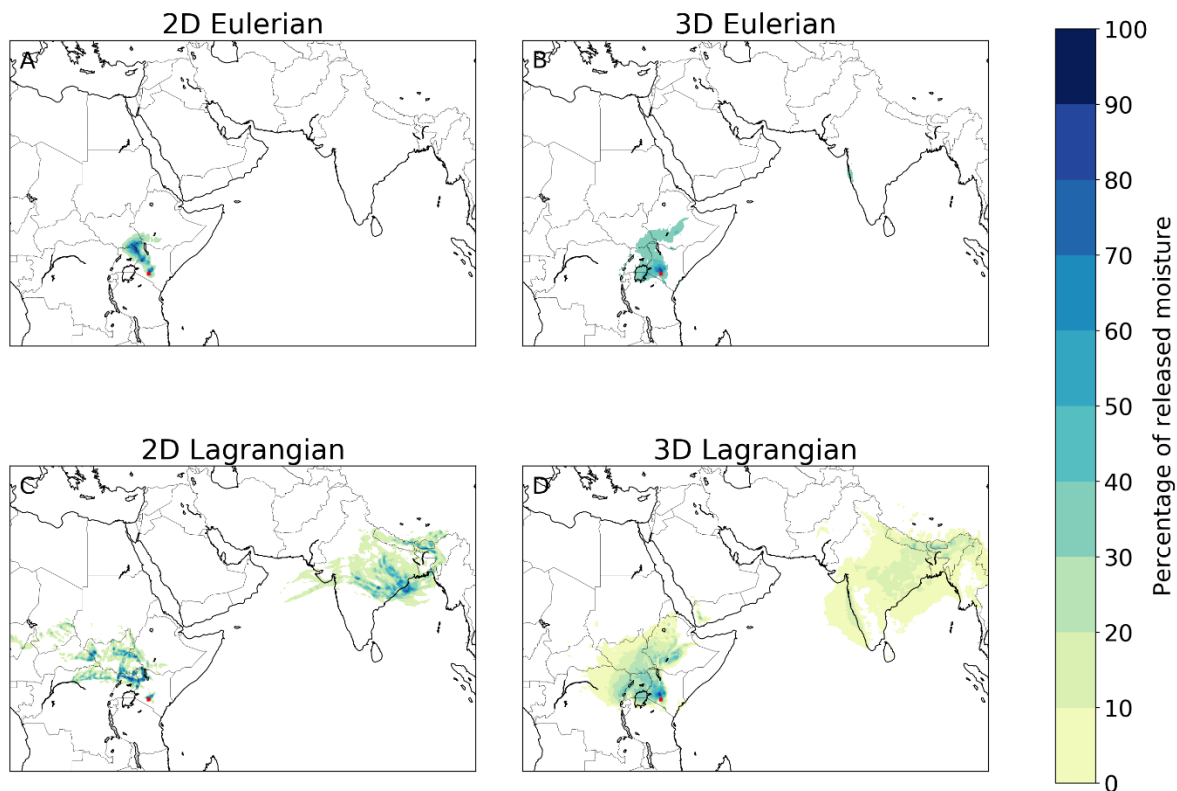

**Figure S5: Different footprints of moisture releases from Nairobi in July 2012 in two-dimensional and three-dimensional Eulerian and Lagrangian models. A) Two-dimensional Eulerian, with a mean latitudinal moisture flow of  $4.0^\circ$  in a northerly direction and mean longitudinal flow of  $1.6^\circ$  in a westerly direction; B) Three-dimensional Eulerian, with a mean latitudinal moisture flow of  $2.2^\circ$  in a northerly direction and mean longitudinal flow of  $0.8^\circ$  in an easterly direction; C) Two-dimensional Lagrangian, with a mean latitudinal moisture flow of  $14.0^\circ$  in a northerly direction and mean longitudinal flow of  $3.9^\circ$  in an easterly direction; D) Three-dimensional Lagrangian, with a mean latitudinal moisture flow of  $6.6^\circ$  in a northerly direction and mean longitudinal flow of  $2.9^\circ$  in an easterly direction.**

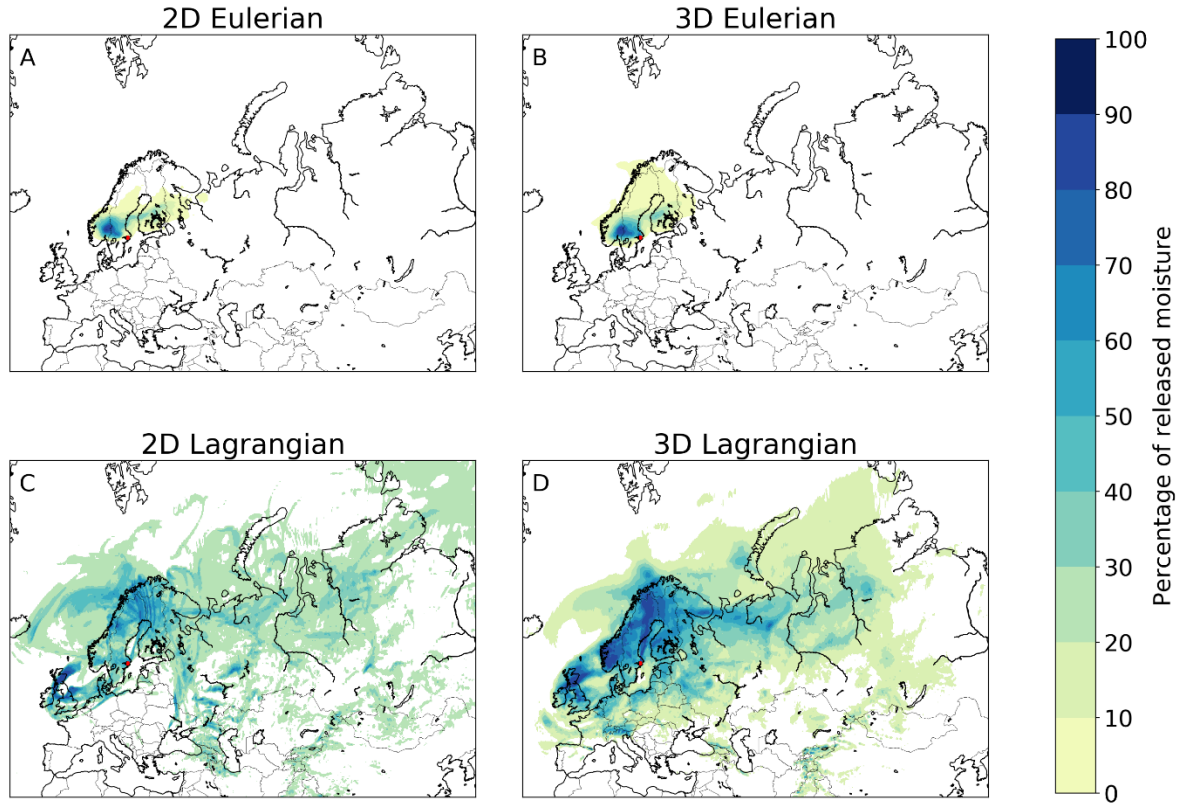

**Figure S6: Different footprints of moisture releases from Stockholm in July 2012 in two-dimensional and three-dimensional Eulerian and Lagrangian models. A) Two-dimensional Eulerian, with a mean latitudinal moisture flow of  $2.6^{\circ}$  in a northerly direction and mean longitudinal flow of  $0.6^{\circ}$  in a westerly direction; B) Three-dimensional Eulerian, with a mean latitudinal moisture flow of  $2.3^{\circ}$  in a northerly direction and mean longitudinal flow of  $1.4^{\circ}$  in a westerly direction; C) Two-dimensional Lagrangian, with a mean latitudinal moisture flow of  $0.0^{\circ}$  in northerly/a southerly direction and mean longitudinal flow of  $13.9^{\circ}$  in an easterly direction; D) Three-dimensional Lagrangian, with a mean latitudinal moisture flow of  $1.4^{\circ}$  in a northerly direction and mean longitudinal flow of  $11.0^{\circ}$  in an easterly direction.**

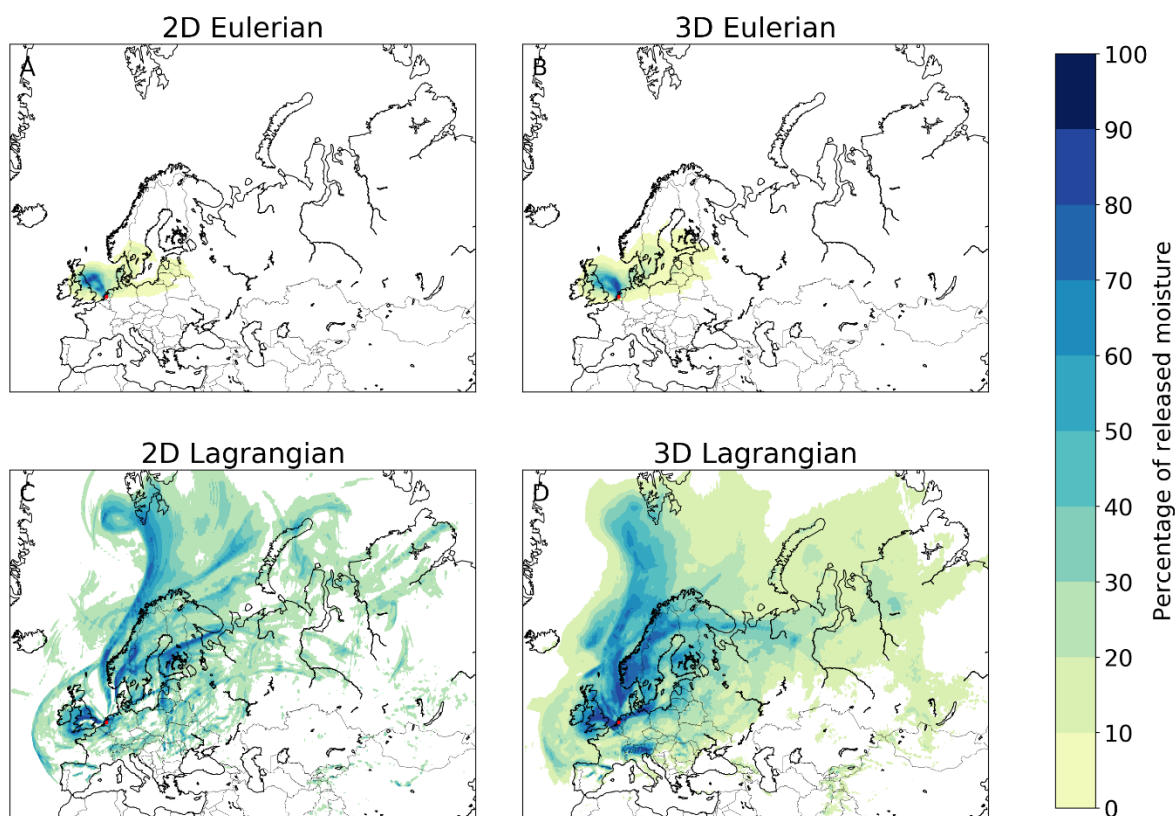

**Figure S7: Different footprints of moisture releases from Utrecht in July 2012 in two-dimensional and three-dimensional Eulerian and Lagrangian models. A) Two-dimensional Eulerian, with a mean latitudinal moisture flow of  $2.8^\circ$  in a northerly direction and mean longitudinal flow of  $11.3^\circ$  in an easterly direction; B) Three-dimensional Eulerian, with a mean latitudinal moisture flow of  $3.1^\circ$  in a northerly direction and mean longitudinal flow of  $9.8^\circ$  in an easterly direction; C) Two-dimensional Lagrangian, with a mean latitudinal moisture flow of  $8.7^\circ$  in a northerly direction and mean longitudinal flow of  $18.1^\circ$  in an easterly direction; D) Three-dimensional Lagrangian, with a mean latitudinal moisture flow of  $6.2^\circ$  in a northerly direction and mean longitudinal flow of  $15.4^\circ$  in an easterly direction.**

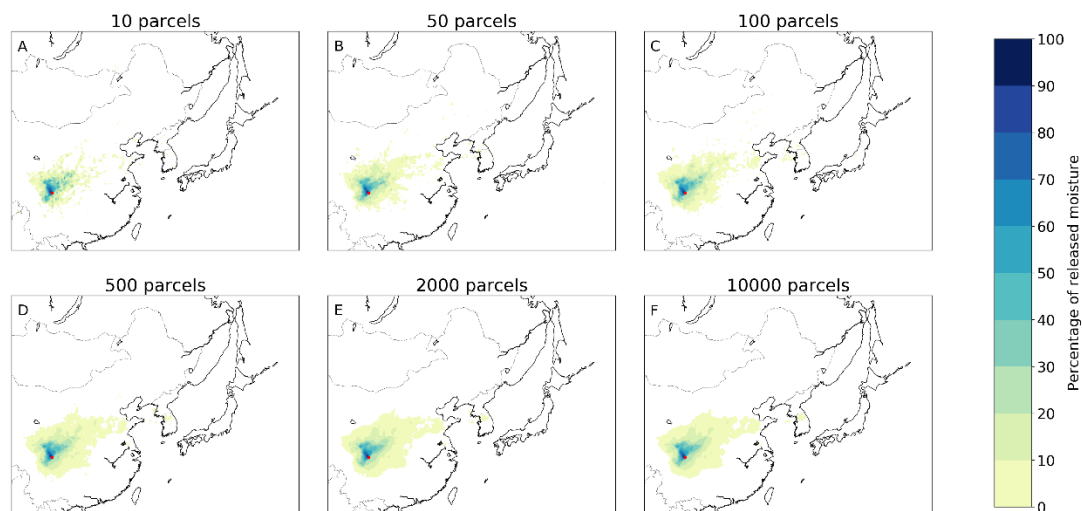

**Figure S8: Different footprints of moisture releases from Chengdu in July 2012 in a three-dimensional Lagrangian model with 10, 50, 100, 500, 2,000, and 10,000 tracked parcels  $\text{mm}^{-1}$ . A) 10 parcels, with a mean latitudinal moisture flow of  $2.4^\circ$  in a northerly direction and mean longitudinal flow of  $2.5^\circ$  in an easterly direction; B) 50 parcels, with a mean latitudinal moisture flow of  $2.3^\circ$  in a northerly direction and mean longitudinal flow of  $2.6^\circ$  in an easterly direction; C) 100 parcels, with a mean latitudinal moisture flow of  $1.9^\circ$  in a northerly direction and mean longitudinal flow of  $1.8^\circ$  in an easterly direction; D) 500 parcels, with a mean latitudinal moisture flow of  $1.9^\circ$  in a northerly direction and mean longitudinal flow of  $1.7^\circ$  in an easterly direction; E) 2,000 parcels, with a mean latitudinal moisture flow of  $1.8^\circ$  in a northerly direction and mean longitudinal flow of  $1.7^\circ$  in an easterly direction; F) 10,000 parcels, with a mean latitudinal moisture flow of  $1.8^\circ$  in a northerly direction and mean longitudinal flow of  $1.7^\circ$  in an easterly direction.**

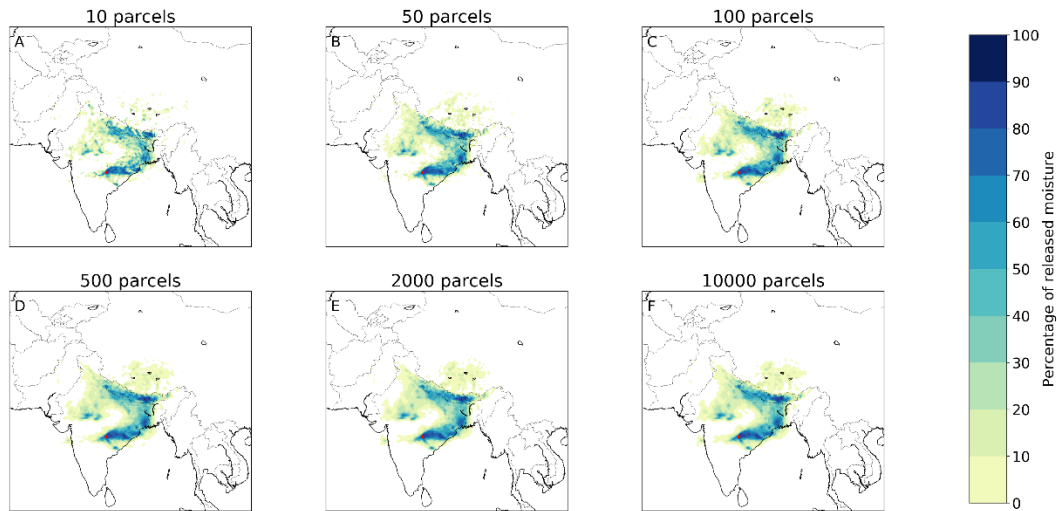

**Figure S9: Different footprints of moisture releases from Nagpur in July 2012 in a three-dimensional Lagrangian model with 10, 50, 100, 500, 2,000, and 10,000 tracked parcels  $\text{mm}^{-1}$ . A) 10 parcels, with a mean latitudinal moisture flow of  $5.0^\circ$  in a northerly direction and mean longitudinal flow of  $3.7^\circ$  in an easterly direction; B) 50 parcels, with a mean latitudinal moisture flow of  $4.9^\circ$  in a northerly direction and mean longitudinal flow of  $3.7^\circ$  in an easterly direction; C) 100 parcels, with a mean latitudinal moisture flow of  $4.7^\circ$  in a northerly direction and mean longitudinal flow of  $3.5^\circ$  in an easterly direction; D) 500 parcels, with a mean latitudinal moisture flow of  $4.7^\circ$  in a northerly direction and mean longitudinal flow of  $3.6^\circ$  in an easterly direction; E) 2,000 parcels, with a mean latitudinal moisture flow of  $4.7^\circ$  in a northerly direction and mean longitudinal flow of  $3.6^\circ$  in an easterly direction; F) 10,000 parcels, with a mean latitudinal moisture flow of  $4.7^\circ$  in a northerly direction and mean longitudinal flow of  $3.6^\circ$  in an easterly direction.**

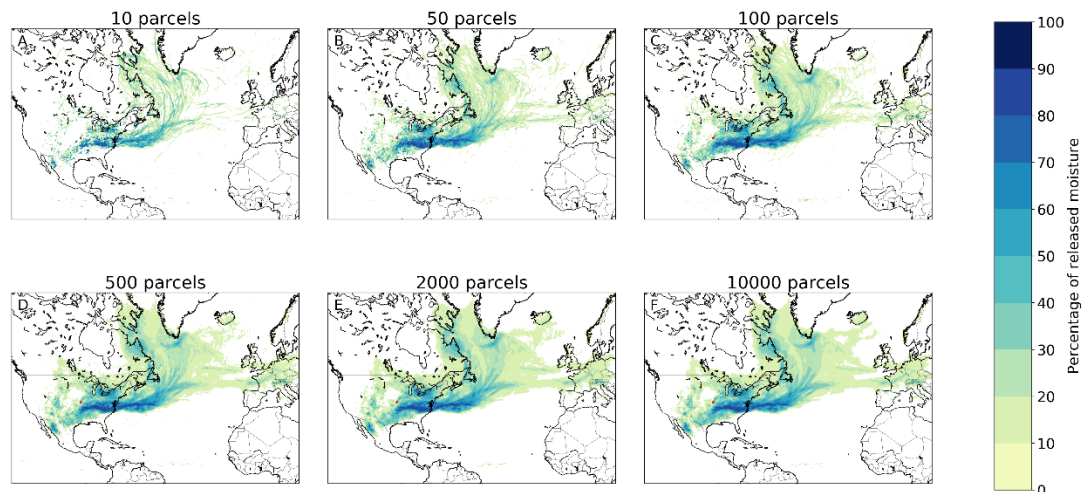

**Figure S10: Different footprints of moisture releases from Central Kansas in July 2012 in a three-dimensional Lagrangian model with 10, 50, 100, 500, 2,000, and 10,000 tracked parcels  $\text{mm}^{-1}$ . A) 10 parcels, with a mean latitudinal moisture flow of  $4.0^\circ$  in a northerly direction and mean longitudinal flow of  $15.2^\circ$  in an easterly direction; B) 50 parcels, with a mean latitudinal moisture flow of  $3.9^\circ$  in a northerly direction and mean longitudinal flow of  $15.2^\circ$  in an easterly direction; C) 100 parcels, with a mean latitudinal moisture flow of  $4.2^\circ$  in a northerly direction and mean longitudinal flow of  $15.4^\circ$  in an easterly direction; D) 500 parcels, with a mean latitudinal moisture flow of  $4.1^\circ$  in a northerly direction and mean longitudinal flow of  $15.6^\circ$  in an easterly direction; E) 2,000 parcels, with a mean latitudinal moisture flow of  $4.1^\circ$  in a northerly direction and mean longitudinal flow of  $15.6^\circ$  in an easterly direction; F) 10,000 parcels, with a mean latitudinal moisture flow of  $4.1^\circ$  in a northerly direction and mean longitudinal flow of  $15.6^\circ$  in an easterly direction.**



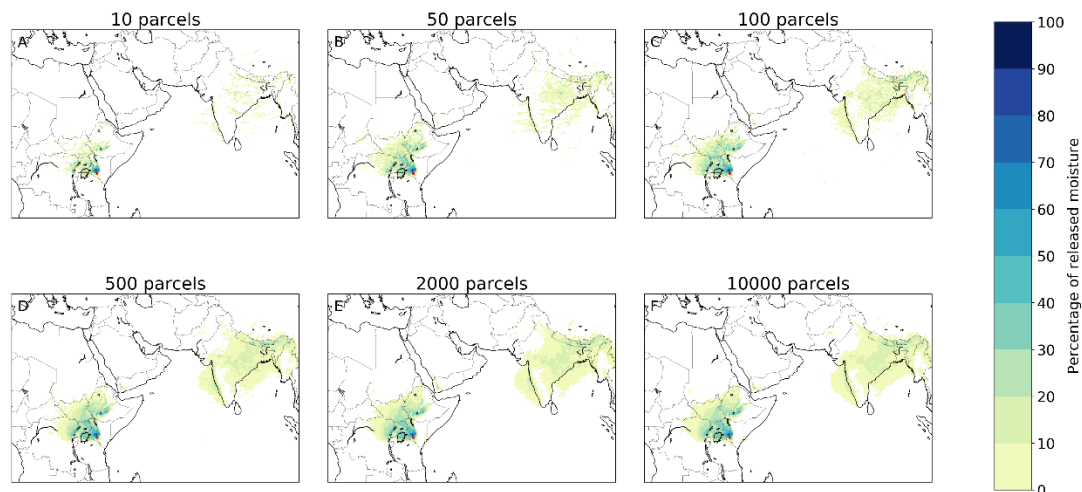

**Figure S11: Different footprints of moisture releases from Nairobi in July 2012 in a three-dimensional Lagrangian model with 10, 50, 100, 500, 2,000, and 10,000 tracked parcels  $\text{mm}^{-1}$ . A) 10 parcels, with a mean latitudinal moisture flow of  $7.2^\circ$  in a northerly direction and mean longitudinal flow of  $3.1^\circ$  in an easterly direction; B) 50 parcels, with a mean latitudinal moisture flow of  $7.5^\circ$  in a northerly direction and mean longitudinal flow of  $3.1^\circ$  in an easterly direction; C) 100 parcels, with a mean latitudinal moisture flow of  $6.7^\circ$  in a northerly direction and mean longitudinal flow of  $2.9^\circ$  in an easterly direction; D) 500 parcels, with a mean latitudinal moisture flow of  $6.9^\circ$  in a northerly direction and mean longitudinal flow of  $3.1^\circ$  in an easterly direction; E) 2,000 parcels, with a mean latitudinal moisture flow of  $6.5^\circ$  in a northerly direction and mean longitudinal flow of  $2.8^\circ$  in an easterly direction; F) 10,000 parcels, with a mean latitudinal moisture flow of  $6.6^\circ$  in a northerly direction and mean longitudinal flow of  $2.9^\circ$  in an easterly direction.**



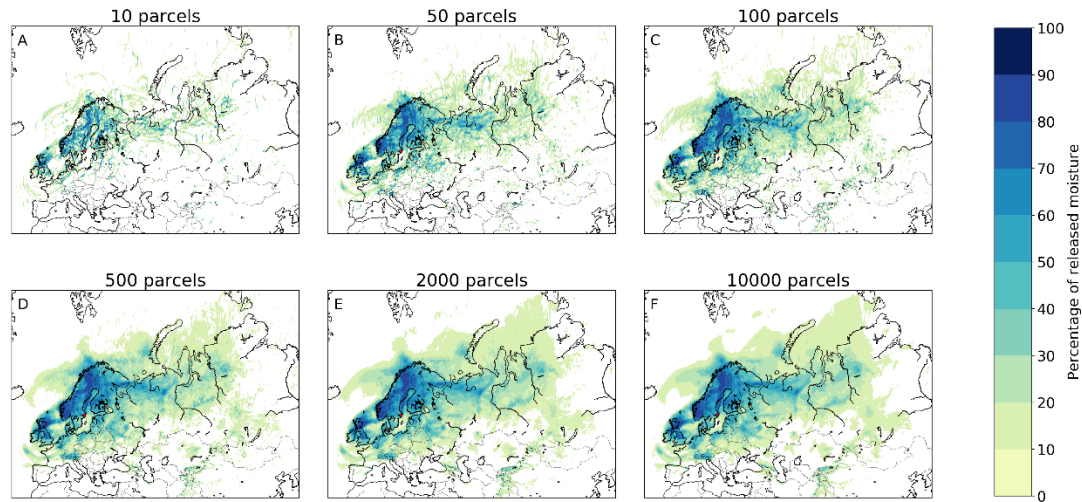

**Figure S12: Different footprints of moisture releases from Stockholm in July 2012 in a three-dimensional Lagrangian model with 10, 50, 100, 500, 2,000, and 10,000 tracked parcels  $\text{mm}^{-1}$ . A) 10 parcels, with a mean latitudinal moisture flow of  $1.8^\circ$  in a northerly direction and mean longitudinal flow of  $11.5^\circ$  in an easterly direction; B) 50 parcels, with a mean latitudinal moisture flow of  $0.9^\circ$  in a northerly direction and mean longitudinal flow of  $11.0^\circ$  in an easterly direction; C) 100 parcels, with a mean latitudinal moisture flow of  $1.3^\circ$  in a northerly direction and mean longitudinal flow of  $11.1^\circ$  in an easterly direction; D) 500 parcels, with a mean latitudinal moisture flow of  $1.5^\circ$  in a northerly direction and mean longitudinal flow of  $11.1^\circ$  in an easterly direction; E) 2,000 parcels, with a mean latitudinal moisture flow of  $1.5^\circ$  in a northerly direction and mean longitudinal flow of  $11.0^\circ$  in an easterly direction; F) 10,000 parcels, with a mean latitudinal moisture flow of  $1.4^\circ$  in a northerly direction and mean longitudinal flow of  $11.0^\circ$  in an easterly direction.**

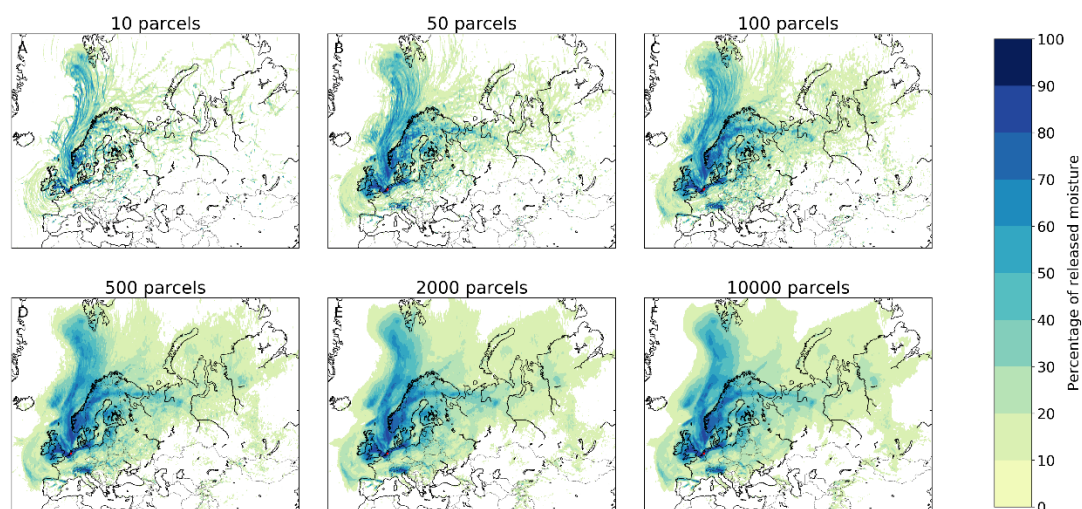

**Figure S13: Different footprints of moisture releases from Utrecht in July 2012 in a three-dimensional Lagrangian model with 10, 50, 100, 500, 2,000, and 10,000 tracked parcels  $\text{mm}^{-1}$ . A) 10 parcels, with a mean latitudinal moisture flow of  $6.8^\circ$  in a northerly direction and mean longitudinal flow of  $15.5^\circ$  in an easterly direction; B) 50 parcels, with a mean latitudinal moisture flow of  $6.4^\circ$  in a northerly direction and mean longitudinal flow of  $15.3^\circ$  in an easterly direction; C) 100 parcels, with a mean latitudinal moisture flow of  $6.1^\circ$  in a northerly direction and mean longitudinal flow of  $15.5^\circ$  in an easterly direction; D) 500 parcels, with a mean latitudinal moisture flow of  $6.4^\circ$  in a northerly direction and mean longitudinal flow of  $15.5^\circ$  in an easterly direction; E) 2,000 parcels, with a mean latitudinal moisture flow of  $6.3^\circ$  in a northerly direction and mean longitudinal flow of  $15.4^\circ$  in an easterly direction; F) 10,000 parcels, with a mean latitudinal moisture flow of  $6.2^\circ$  in a northerly direction and mean longitudinal flow of  $15.4^\circ$  in an easterly direction.**

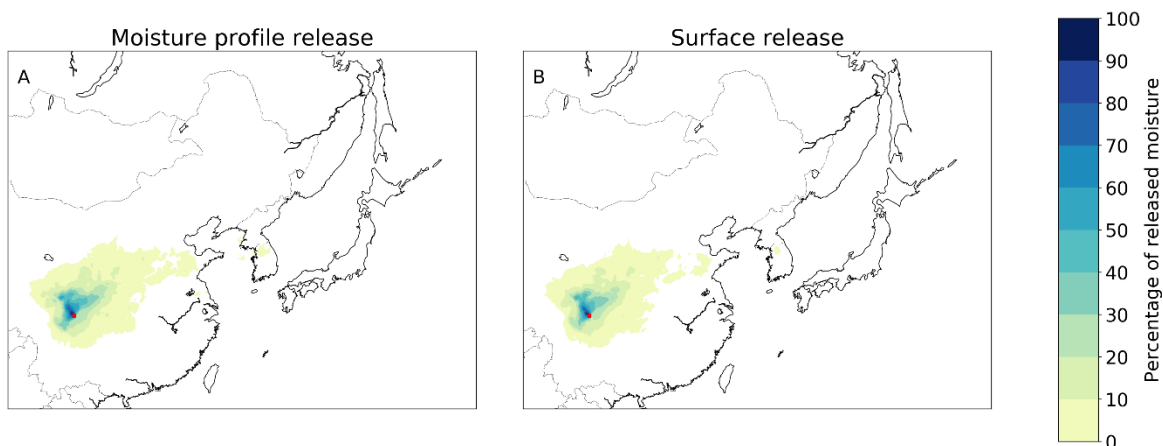

**Figure S14: Different footprints of moisture releases from Chengdu in July 2012 in a three-dimensional Lagrangian model with moisture released according to the vertical moisture profile of the atmosphere and moisture released at the surface. A) Release according to the moisture profile, with a mean latitudinal moisture flow of  $2.3^{\circ}$  in a northerly direction and mean longitudinal flow of  $2.4^{\circ}$  in an easterly direction; B) Release at the surface, with a mean latitudinal moisture flow of  $2.0^{\circ}$  in a northerly direction and mean longitudinal flow of  $2.1^{\circ}$  in an easterly direction.**

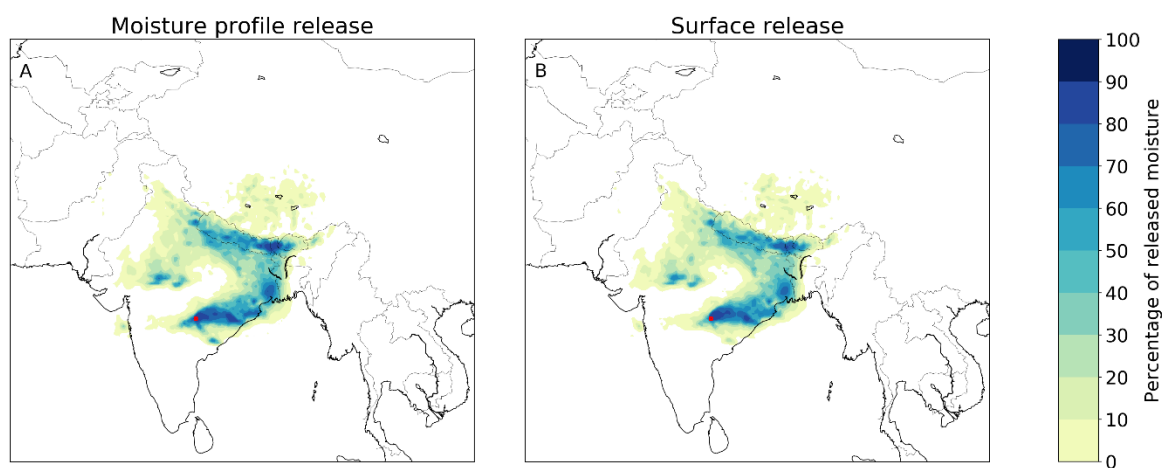

**Figure S15: Different footprints of moisture releases from Nagpur in July 2012 in a three-dimensional Lagrangian model with moisture released according to the vertical moisture profile of the atmosphere and moisture released at the surface. A) Release according to the moisture profile, with a mean latitudinal moisture flow of  $4.9^{\circ}$  in a northerly direction and mean longitudinal flow of  $3.6^{\circ}$  in an easterly direction; B) Release at the surface, with a mean latitudinal moisture flow of  $4.7^{\circ}$  in a northerly direction and mean longitudinal flow of  $3.3^{\circ}$  in an easterly direction.**

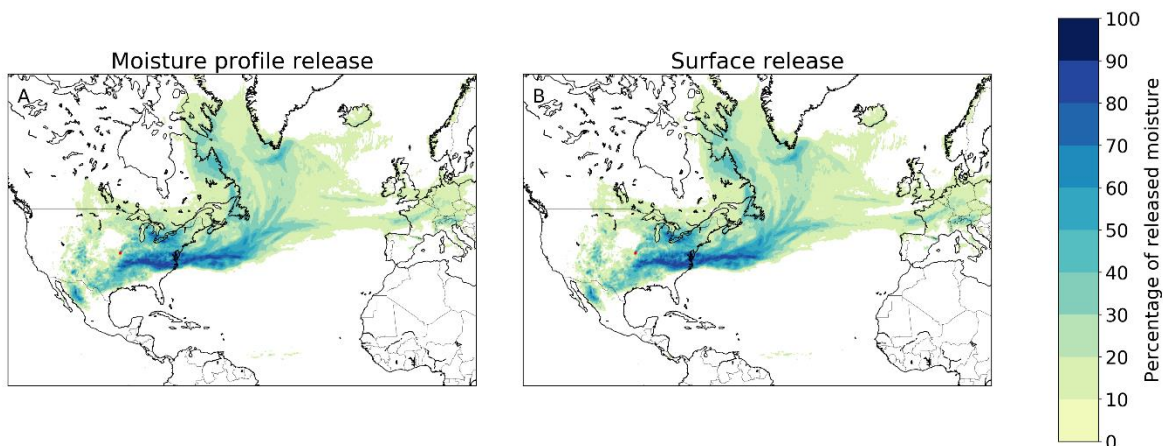

**Figure S16: Different footprints of moisture releases from Central Kansas in July 2012 in a three-dimensional Lagrangian model with moisture released according to the vertical moisture profile of the atmosphere and moisture released at the surface. A) Release according to the moisture profile, with a mean latitudinal moisture flow of  $4.0^{\circ}$  in a northerly direction and mean longitudinal flow of  $15.2^{\circ}$  in an easterly direction; B) Release at the surface, with a mean latitudinal moisture flow of  $4.0^{\circ}$  in a northerly direction and mean longitudinal flow of  $15.3^{\circ}$  in an easterly direction.**

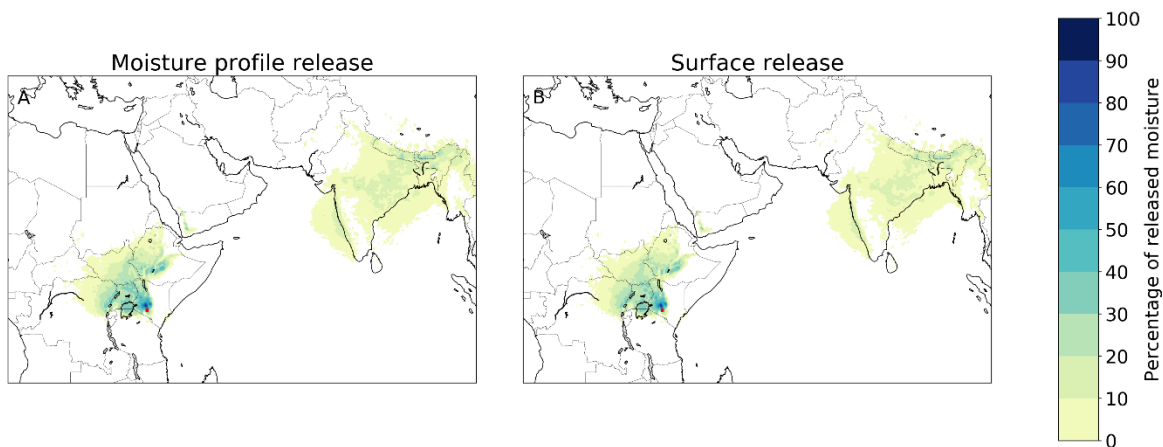

**Figure S17: Different footprints of moisture releases from Nairobi in July 2012 in a three-dimensional Lagrangian model with moisture released according to the vertical moisture profile of the atmosphere and moisture released at the surface. A) Release according to the moisture profile, with a mean latitudinal moisture flow of  $7.2^{\circ}$  in a northerly direction and mean longitudinal flow of  $3.0^{\circ}$  in an easterly direction; B) Release at the surface, with a mean latitudinal moisture flow of  $6.7^{\circ}$  in a northerly direction and mean longitudinal flow of  $2.6^{\circ}$  in an easterly direction.**

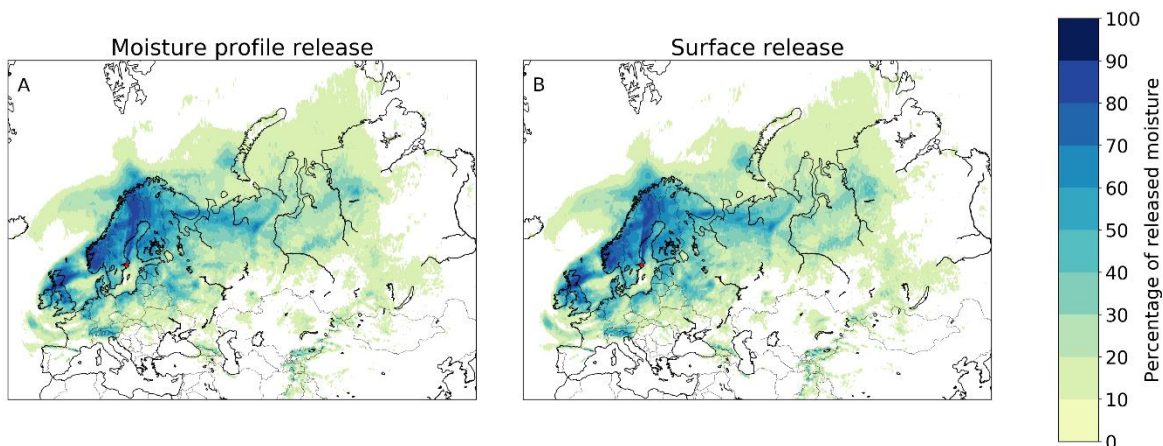

**Figure S18: Different footprints of moisture releases from Stockholm in July 2012 in a three-dimensional Lagrangian model with moisture released according to the vertical moisture profile of the atmosphere and moisture released at the surface. A) Release according to the moisture profile, with a mean latitudinal moisture flow of  $1.3^\circ$  in a northerly direction and mean longitudinal flow of  $11.1^\circ$  in an easterly direction; B) Release at the surface, with a mean latitudinal moisture flow of  $1.3^\circ$  in a northerly direction and mean longitudinal flow of  $10.8^\circ$  in an easterly direction.**

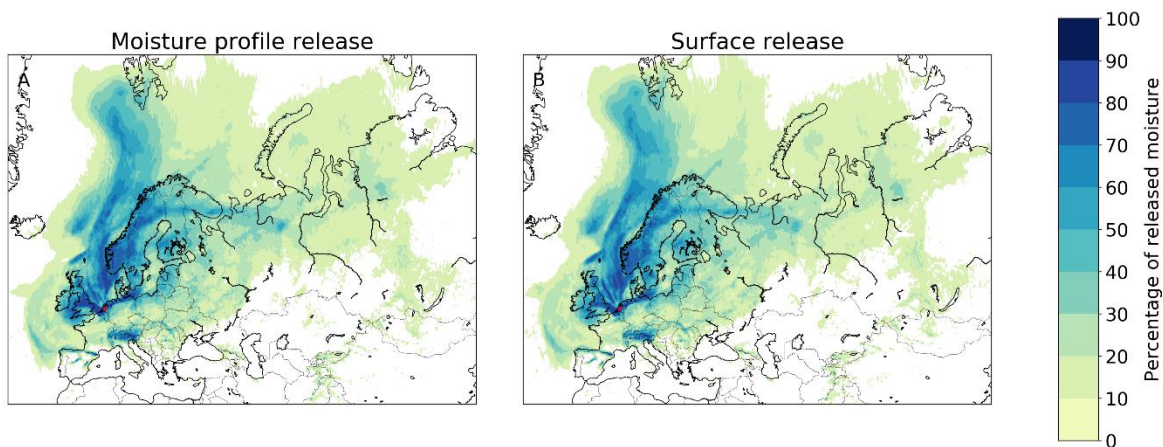

**Figure S19: Different footprints of moisture releases from Utrecht in July 2012 in a three-dimensional Lagrangian model with moisture released according to the vertical moisture profile of the atmosphere and moisture released at the surface. A) Release according to the moisture profile, with a mean latitudinal moisture flow of  $6.0^\circ$  in a northerly direction and mean longitudinal flow of  $15.4^\circ$  in an easterly direction; B) Release at the surface, with a mean latitudinal moisture flow of  $5.8^\circ$  in a northerly direction and mean longitudinal flow of  $14.6^\circ$  in an easterly direction.**



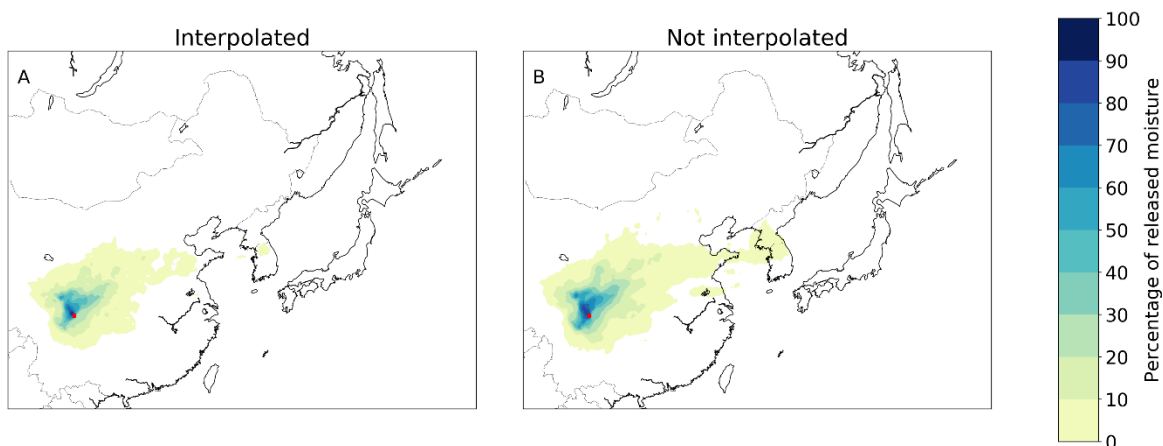

**Figure S20: Different footprints of moisture releases from Chengdu in July 2012 in a three-dimensional Lagrangian model with and without interpolation of wind speed and directions. A) Interpolated, with a mean latitudinal moisture flow of  $1.8^\circ$  in a northerly direction and mean longitudinal flow of  $1.7^\circ$  in an easterly direction; B) Not interpolated, with a mean latitudinal moisture flow of  $2.3^\circ$  in a northerly direction and mean longitudinal flow of  $2.4^\circ$  in an easterly direction.**

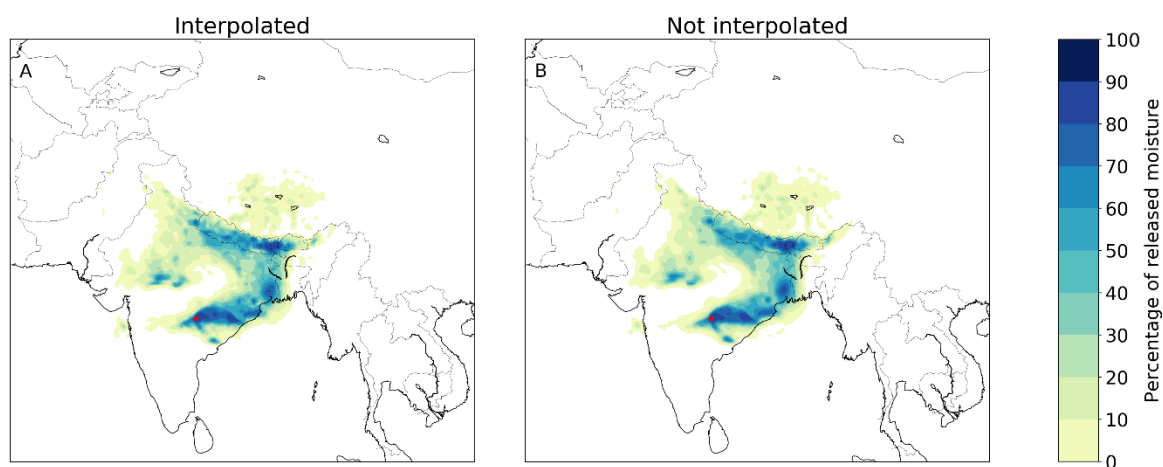

**Figure S21: Different footprints of moisture releases from Nagpur in July 2012 in a three-dimensional Lagrangian model with and without interpolation of wind speed and directions. A) Interpolated, with a mean latitudinal moisture flow of  $4.7^\circ$  in a northerly direction and mean longitudinal flow of  $3.6^\circ$  in an easterly direction; B) Not interpolated, with a mean latitudinal moisture flow of  $4.9^\circ$  in a northerly direction and mean longitudinal flow of  $3.6^\circ$  in an easterly direction.**

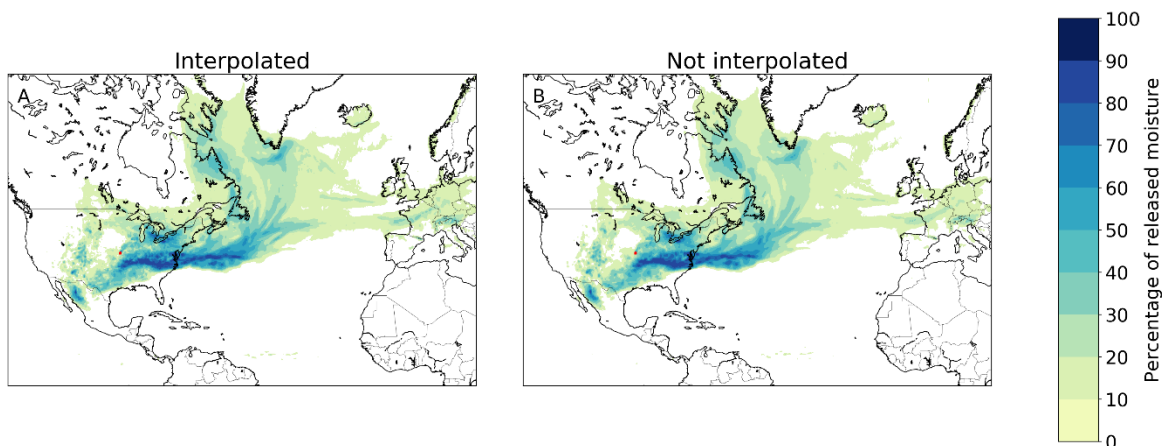

**Figure S22: Different footprints of moisture releases from Central Kansas in July 2012 in a three-dimensional Lagrangian model with and without interpolation of wind speed and directions. A) Interpolated, with a mean latitudinal moisture flow of  $4.1^\circ$  in a northerly direction and mean longitudinal flow of  $15.6^\circ$  in an easterly direction; B) Not interpolated, with a mean latitudinal moisture flow of  $4.0^\circ$  in a northerly direction and mean longitudinal flow of  $15.2^\circ$  in an easterly direction.**

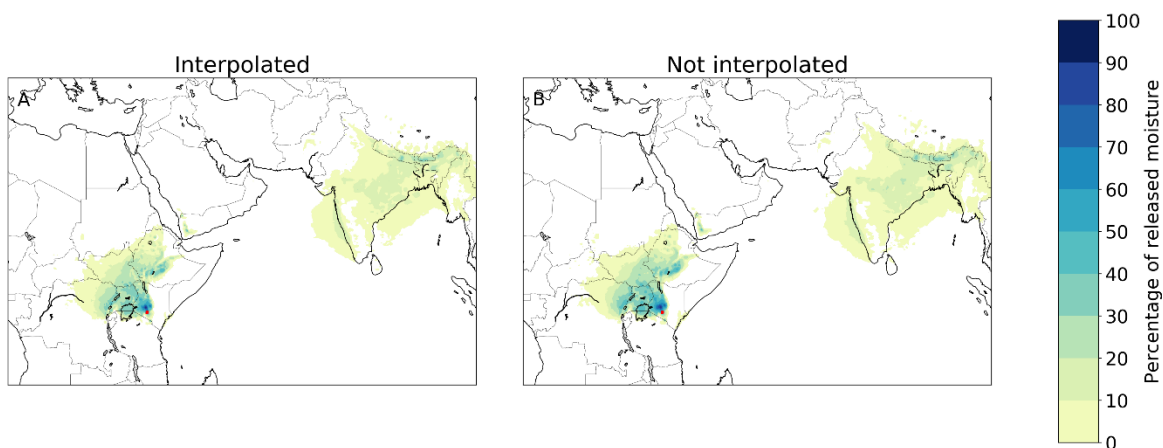

**Figure S23: Different footprints of moisture releases from Nairobi in July 2012 in a three-dimensional Lagrangian model with and without interpolation of wind speed and directions. A) Interpolated, with a mean latitudinal moisture flow of  $6.6^\circ$  in a northerly direction and mean longitudinal flow of  $2.9^\circ$  in an easterly direction; B) Not interpolated, with a mean latitudinal moisture flow of  $7.2^\circ$  in a northerly direction and mean longitudinal flow of  $3.0^\circ$  in an easterly direction.**

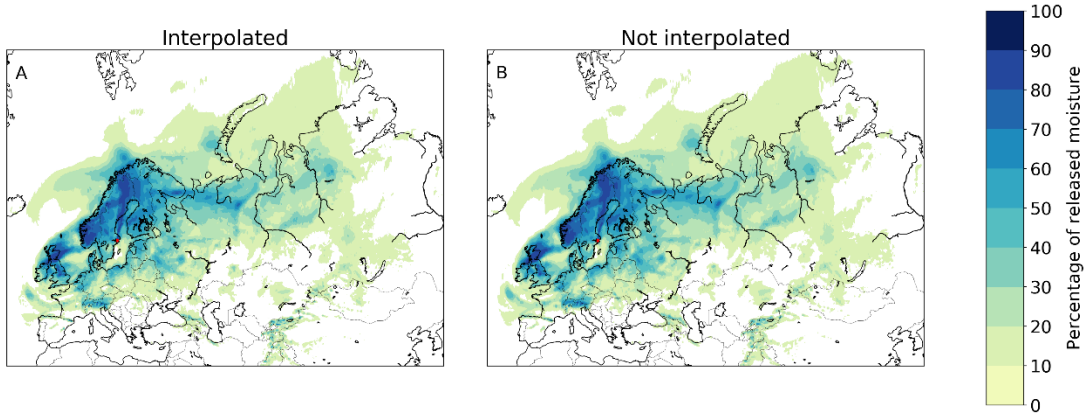

**Figure S24: Different footprints of moisture releases from Stockholm in July 2012 in a three-dimensional Lagrangian model with and without interpolation of wind speed and directions. A) Interpolated, with a mean latitudinal moisture flow of  $1.4^{\circ}$  in a northerly direction and mean longitudinal flow of  $11.0^{\circ}$  in an easterly direction; B) Not interpolated, with a mean latitudinal moisture flow of  $1.3^{\circ}$  in a northerly direction and mean longitudinal flow of  $11.1^{\circ}$  in an easterly direction.**

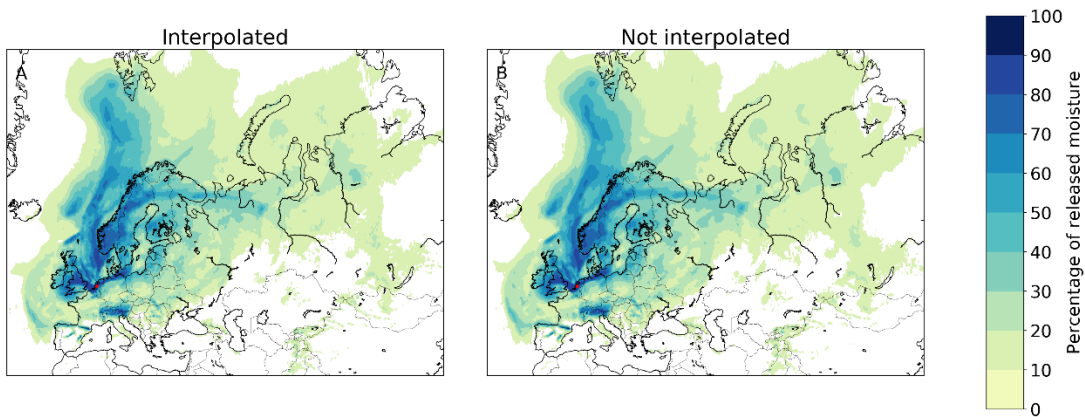

**Figure S25: Different footprints of moisture releases from Utrecht in July 2012 in a three-dimensional Lagrangian model with and without interpolation of wind speed and directions. A) Interpolated, with a mean latitudinal moisture flow of  $6.2^{\circ}$  in a northerly direction and mean longitudinal flow of  $15.4^{\circ}$  in an easterly direction; B) Not interpolated, with a mean latitudinal moisture flow of  $6.1^{\circ}$  in a northerly direction and mean longitudinal flow of  $15.3^{\circ}$  in an easterly direction.**



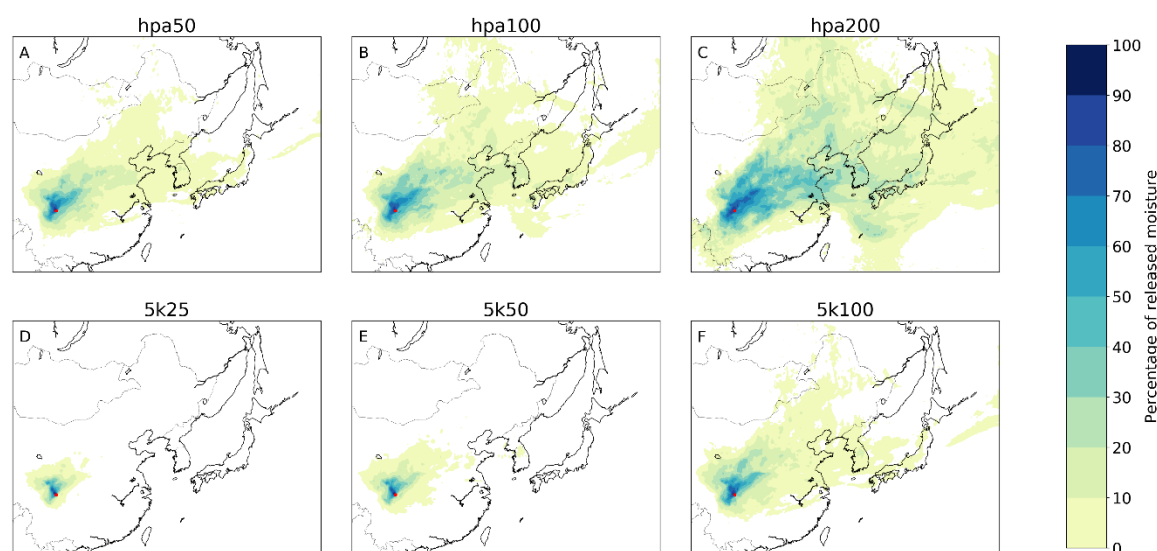

**Figure S26: Different footprints of moisture releases from Chengdu in July 2012 in a three-dimensional Lagrangian model with different degradations of the vertical moisture profile. A) hpa50, with a mean latitudinal moisture flow of  $3.1^\circ$  in a northerly direction and mean longitudinal flow of  $4.0^\circ$  in an easterly direction; B) hpa100, with a mean latitudinal moisture flow of  $3.8^\circ$  in a northerly direction and mean longitudinal flow of  $5.7^\circ$  in an easterly direction; C) hpa200, with a mean latitudinal moisture flow of  $4.9^\circ$  in a northerly direction and mean longitudinal flow of  $9.2^\circ$  in an easterly direction; D) 5k25, with a mean latitudinal moisture flow of  $1.6^\circ$  in a northerly direction and mean longitudinal flow of  $0.3^\circ$  in an easterly direction; E) 5k50, with a mean latitudinal moisture flow of  $2.2^\circ$  in a northerly direction and mean longitudinal flow of  $1.4^\circ$  in an easterly direction; F) 5k100, with a mean latitudinal moisture flow of  $3.5^\circ$  in a northerly direction and mean longitudinal flow of  $3.6^\circ$  in an easterly direction.**

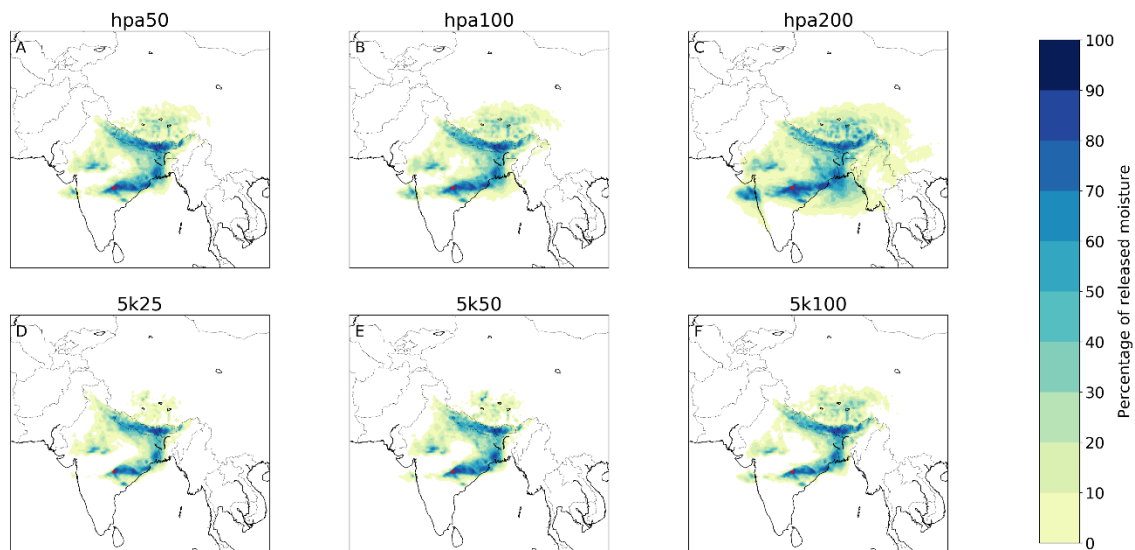

**Figure S27: Different footprints of moisture releases from Nagpur in July 2012 in a three-dimensional Lagrangian model with different degradations of the vertical moisture profile. A) hpa50, with a mean latitudinal moisture flow of  $4.9^\circ$  in a northerly direction and mean longitudinal flow of  $4.6^\circ$  in an easterly direction; B) hpa100, with a mean latitudinal moisture flow of  $4.8^\circ$  in a northerly direction and mean longitudinal flow of  $5.1^\circ$  in an easterly direction; C) hpa200, with a mean latitudinal moisture flow of  $3.1^\circ$  in a northerly direction and mean longitudinal flow of  $5.1^\circ$  in an easterly direction; D) 5k25, with a mean latitudinal moisture flow of  $5.0^\circ$  in a northerly direction and mean longitudinal flow of  $4.0^\circ$  in an easterly direction; E) 5k50, with a mean latitudinal moisture flow of  $4.8^\circ$  in a northerly direction and mean longitudinal flow of  $3.8^\circ$  in an easterly direction; F) 5k100, with a mean latitudinal moisture flow of  $5.4^\circ$  in a northerly direction and mean longitudinal flow of  $5.6^\circ$  in an easterly direction.**

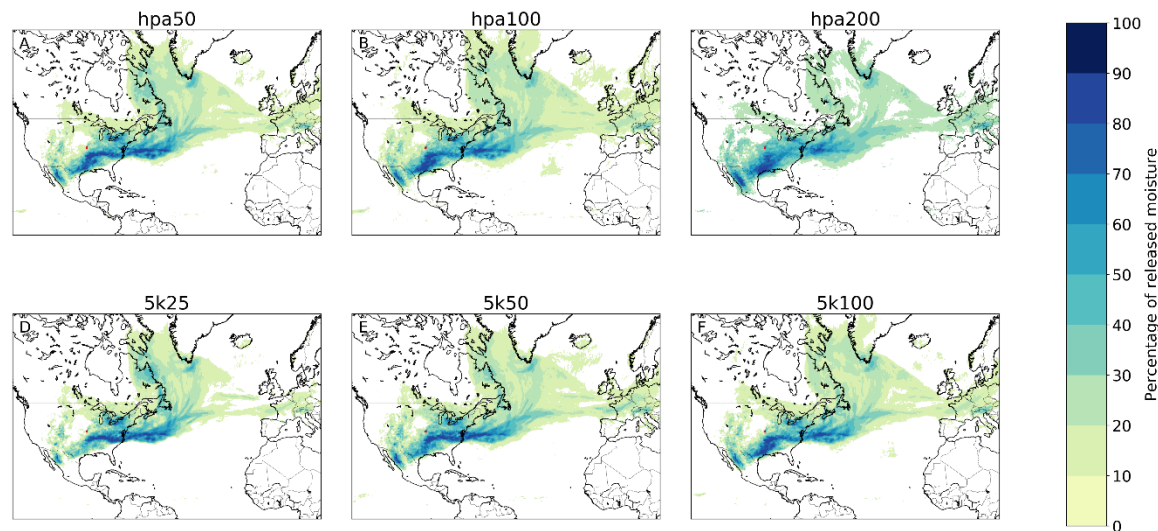

**Figure S28: Different footprints of moisture releases from Central Kansas in July 2012 in a three-dimensional Lagrangian model with different degradations of the vertical moisture profile. A) hpa50, with a mean latitudinal moisture flow of  $2.8^\circ$  in a northerly direction and mean longitudinal flow of  $13.8^\circ$  in an easterly direction; B) hpa100, with a mean latitudinal moisture flow of  $1.8^\circ$  in a northerly direction and mean longitudinal flow of  $11.2^\circ$  in an easterly direction; C) hpa200, with a mean latitudinal moisture flow of  $0.2^\circ$  in a southerly direction and mean longitudinal flow of  $6.6^\circ$  in an easterly direction; D) 5k25, with a mean latitudinal moisture flow of  $4.1^\circ$  in a northerly direction and mean longitudinal flow of  $16.7^\circ$  in an easterly direction; E) 5k50, with a mean latitudinal moisture flow of  $2.4^\circ$  in a northerly direction and mean longitudinal flow of  $11.9^\circ$  in an easterly direction; F) 5k100, with a mean latitudinal moisture flow of  $2.2^\circ$  in a northerly direction and mean longitudinal flow of  $12.0^\circ$  in an easterly direction.**

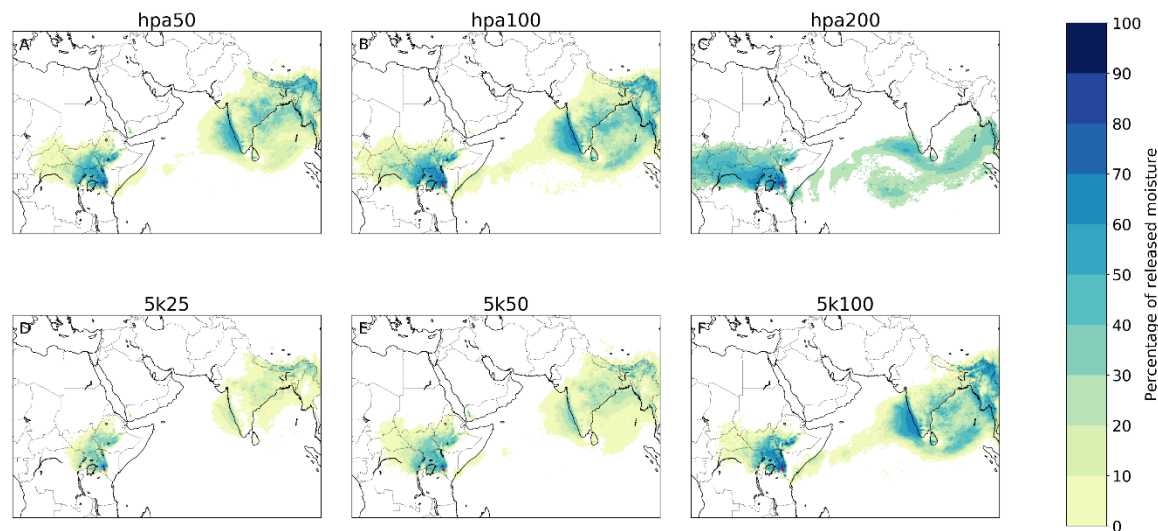

**Figure S29: Different footprints of moisture releases from Nairobi in July 2012 in a three-dimensional Lagrangian model with different degradations of the vertical moisture profile. A) hpa50, with a mean latitudinal moisture flow of  $11.3^\circ$  in a northerly direction and mean longitudinal flow of  $9.8^\circ$  in an easterly direction; B) hpa100, with a mean latitudinal moisture flow of  $11.0^\circ$  in a northerly direction and mean longitudinal flow of  $11.0^\circ$  in an easterly direction; C) hpa200, with a mean latitudinal moisture flow of  $4.3^\circ$  in a northerly direction and mean longitudinal flow of  $2.7^\circ$  in an easterly direction; D) 5k25, with a mean latitudinal moisture flow of  $8.6^\circ$  in a northerly direction and mean longitudinal flow of  $5.4^\circ$  in an easterly direction; E) 5k50, with a mean latitudinal moisture flow of  $8.5^\circ$  in a northerly direction and mean longitudinal flow of  $5.9^\circ$  in an easterly direction; F) 5k100, with a mean latitudinal moisture flow of  $13.2^\circ$  in a northerly direction and mean longitudinal flow of  $14.1^\circ$  in an easterly direction.**

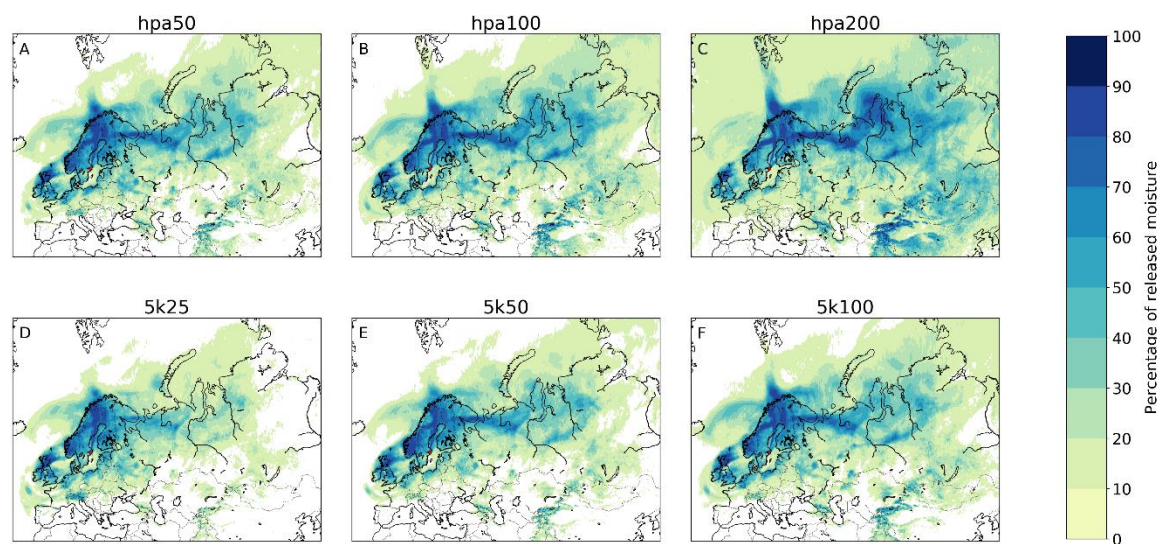

**Figure S30: Different footprints of moisture releases from Stockholm in July 2012 in a three-dimensional Lagrangian model with different degradations of the vertical moisture profile. A) hpa50, with a mean latitudinal moisture flow of  $1.7^\circ$  in a northerly direction and mean longitudinal flow of  $14.0^\circ$  in an easterly direction; B) hpa100, with a mean latitudinal moisture flow of  $1.3^\circ$  in a northerly direction and mean longitudinal flow of  $15.4^\circ$  in an easterly direction; C) hpa200, with a mean latitudinal moisture flow of  $0.0^\circ$  in northerly/a southerly direction and mean longitudinal flow of  $18.1^\circ$  in an easterly direction; D) 5k25, with a mean latitudinal moisture flow of  $1.1^\circ$  in a northerly direction and mean longitudinal flow of  $11.1^\circ$  in an easterly direction; E) 5k50, with a mean latitudinal moisture flow of  $2.5^\circ$  in a northerly direction and mean longitudinal flow of  $12.9^\circ$  in an easterly direction; F) 5k100, with a mean latitudinal moisture flow of  $1.4^\circ$  in a northerly direction and mean longitudinal flow of  $14.4^\circ$  in an easterly direction.**

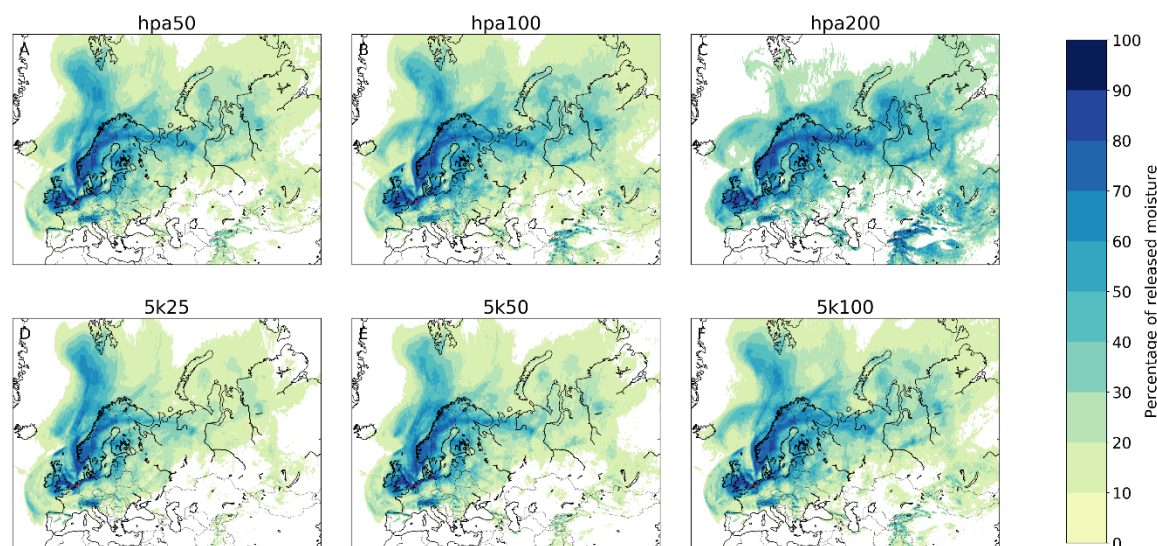

**Figure S31: Different footprints of moisture releases from Utrecht in July 2012 in a three-dimensional Lagrangian model with different degradations of the vertical moisture profile. A) hpa50, with a mean latitudinal moisture flow of  $7.0^\circ$  in a northerly direction and mean longitudinal flow of  $17.9^\circ$  in an easterly direction; B) hpa100, with a mean latitudinal moisture flow of  $6.3^\circ$  in a northerly direction and mean longitudinal flow of  $19.1^\circ$  in an easterly direction; C) hpa200, with a mean latitudinal moisture flow of  $3.8^\circ$  in a northerly direction and mean longitudinal flow of  $21.0^\circ$  in an easterly direction; D) 5k25, with a mean latitudinal moisture flow of  $6.7^\circ$  in a northerly direction and mean longitudinal flow of  $15.7^\circ$  in an easterly direction; E) 5k50, with a mean latitudinal moisture flow of  $7.2^\circ$  in a northerly direction and mean longitudinal flow of  $17.0^\circ$  in an easterly direction; F) 5k100, with a mean latitudinal moisture flow of  $6.7^\circ$  in a northerly direction and mean longitudinal flow of  $18.7^\circ$  in an easterly direction.**



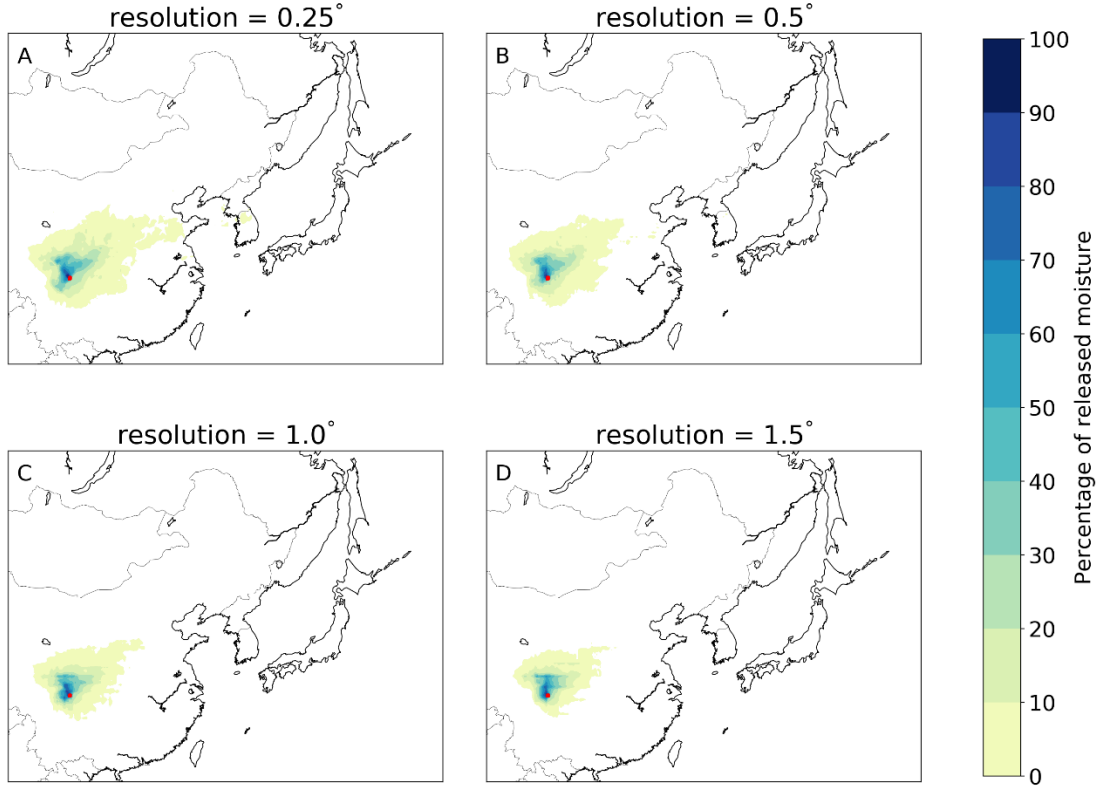

**Figure S32: Different footprints of moisture releases from Chengdu in July 2012 in a three-dimensional Lagrangian model with different horizontal resolutions. A) 0.25°, with a mean latitudinal moisture flow of 1.8° in a northerly direction and mean longitudinal flow of 1.7° in an easterly direction; B) 0.5°, with a mean latitudinal moisture flow of 1.7° in a northerly direction and mean longitudinal flow of 1.4° in an easterly direction; C) 1.0°, with a mean latitudinal moisture flow of 1.6° in a northerly direction and mean longitudinal flow of 1.2° in an easterly direction; D) 1.5°, with a mean latitudinal moisture flow of 1.6° in a northerly direction and mean longitudinal flow of 1.1° in an easterly direction.**

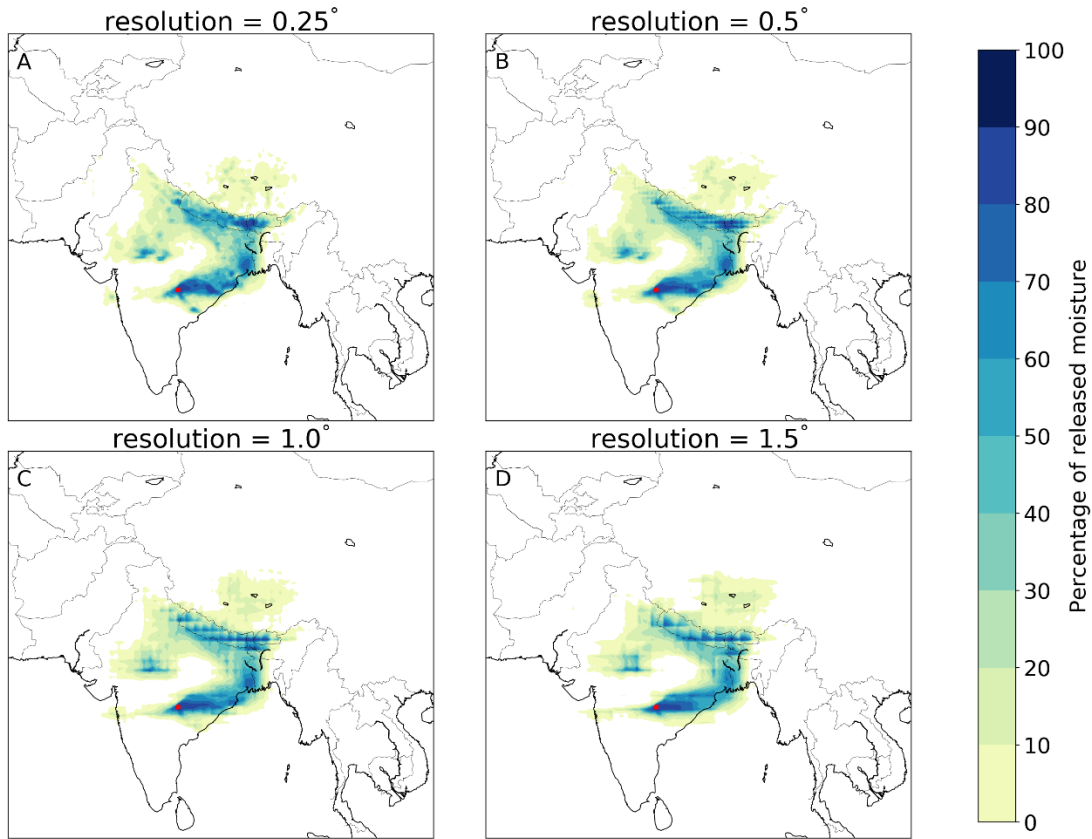

**Figure S33: Different footprints of moisture releases from Nagpur in July 2012 in a three-dimensional Lagrangian model with different horizontal resolutions. A) 0.25°, with a mean latitudinal moisture flow of 4.7° in a northerly direction and mean longitudinal flow of 3.6° in an easterly direction; B) 0.5°, with a mean latitudinal moisture flow of 4.7° in a northerly direction and mean longitudinal flow of 3.7° in an easterly direction; C) 1.0°, with a mean latitudinal moisture flow of 4.7° in a northerly direction and mean longitudinal flow of 3.9° in an easterly direction; D) 1.5°, with a mean latitudinal moisture flow of 4.6° in a northerly direction and mean longitudinal flow of 4.1° in an easterly direction.**



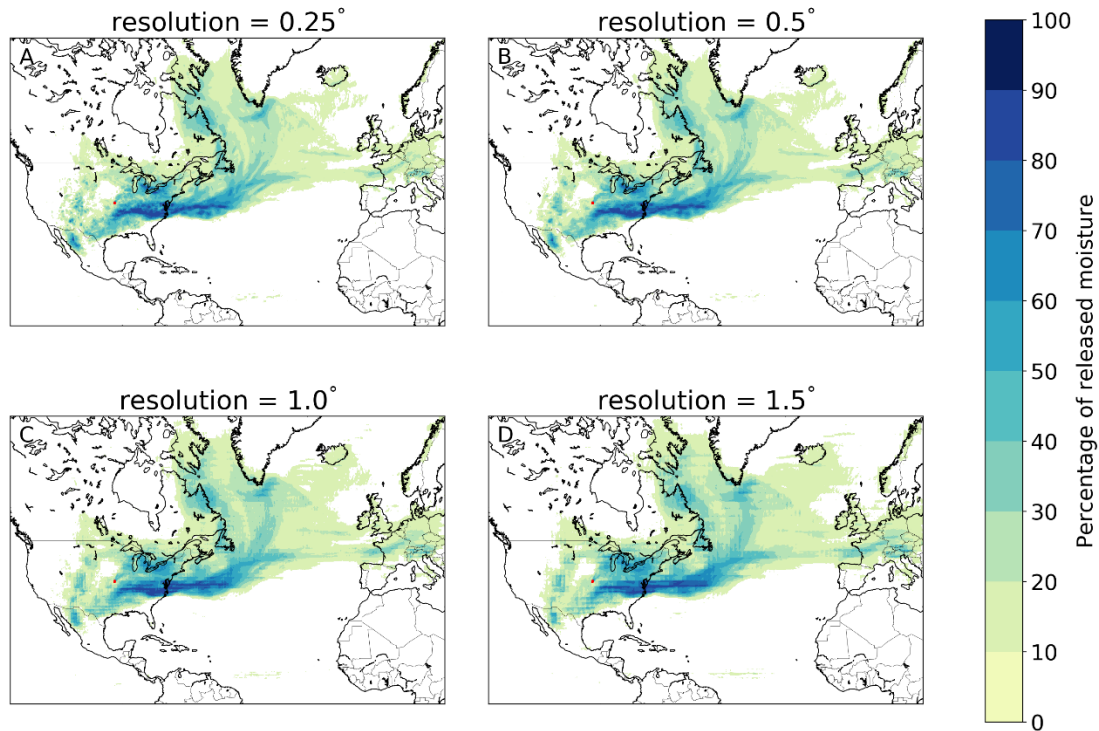

**Figure S34: Different footprints of moisture releases from Central Kansas in July 2012 in a three-dimensional Lagrangian model with different horizontal resolutions. A) 0.25°, with a mean latitudinal moisture flow of 4.1° in a northerly direction and mean longitudinal flow of 15.6° in an easterly direction; B) 0.5°, with a mean latitudinal moisture flow of 4.3° in a northerly direction and mean longitudinal flow of 15.9° in an easterly direction; C) 1.0°, with a mean latitudinal moisture flow of 4.6° in a northerly direction and mean longitudinal flow of 16.2° in an easterly direction; D) 1.5°, with a mean latitudinal moisture flow of 4.9° in a northerly direction and mean longitudinal flow of 16.3° in an easterly direction.**

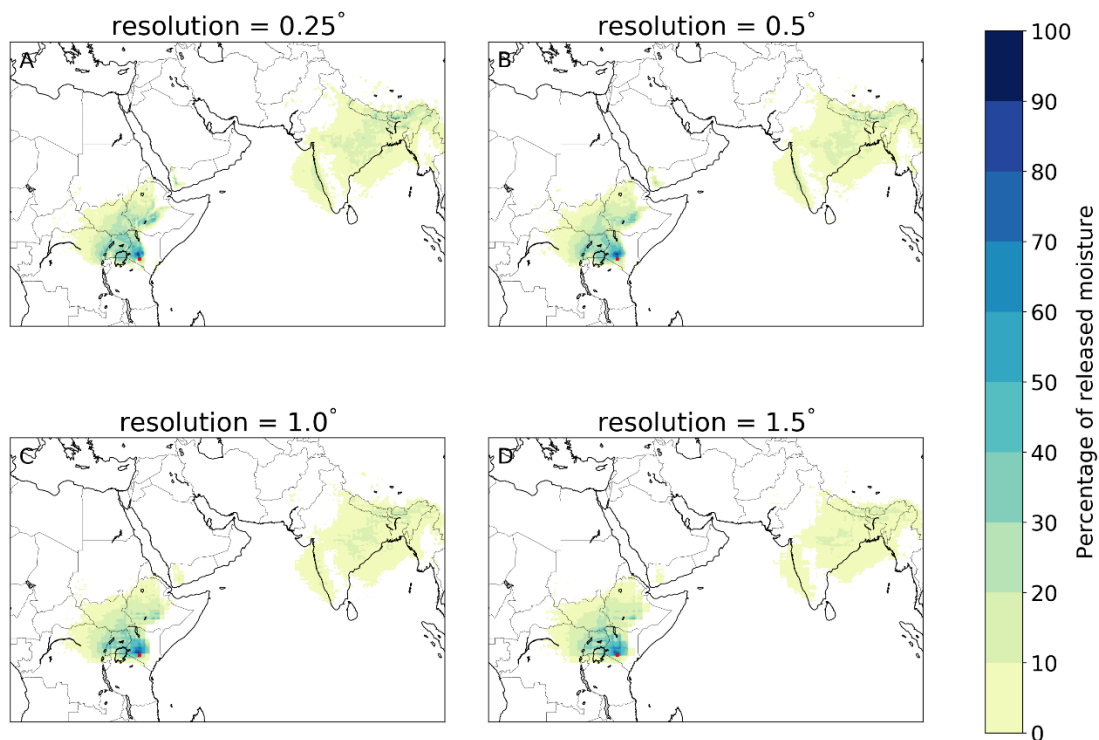

**Figure S35: Different footprints of moisture releases from Nairobi in July 2012 in a three-dimensional Lagrangian model with different horizontal resolutions. A) 0.25°, with a mean latitudinal moisture flow of 6.6° in a northerly direction and mean longitudinal flow of 2.9° in an easterly direction; B) 0.5°, with a mean latitudinal moisture flow of 5.9° in a northerly direction and mean longitudinal flow of 2.2° in an easterly direction; C) 1.0°, with a mean latitudinal moisture flow of 5.4° in a northerly direction and mean longitudinal flow of 1.5° in an easterly direction; D) 1.5°, with a mean latitudinal moisture flow of 5.0° in a northerly direction and mean longitudinal flow of 1.2° in an easterly direction.**

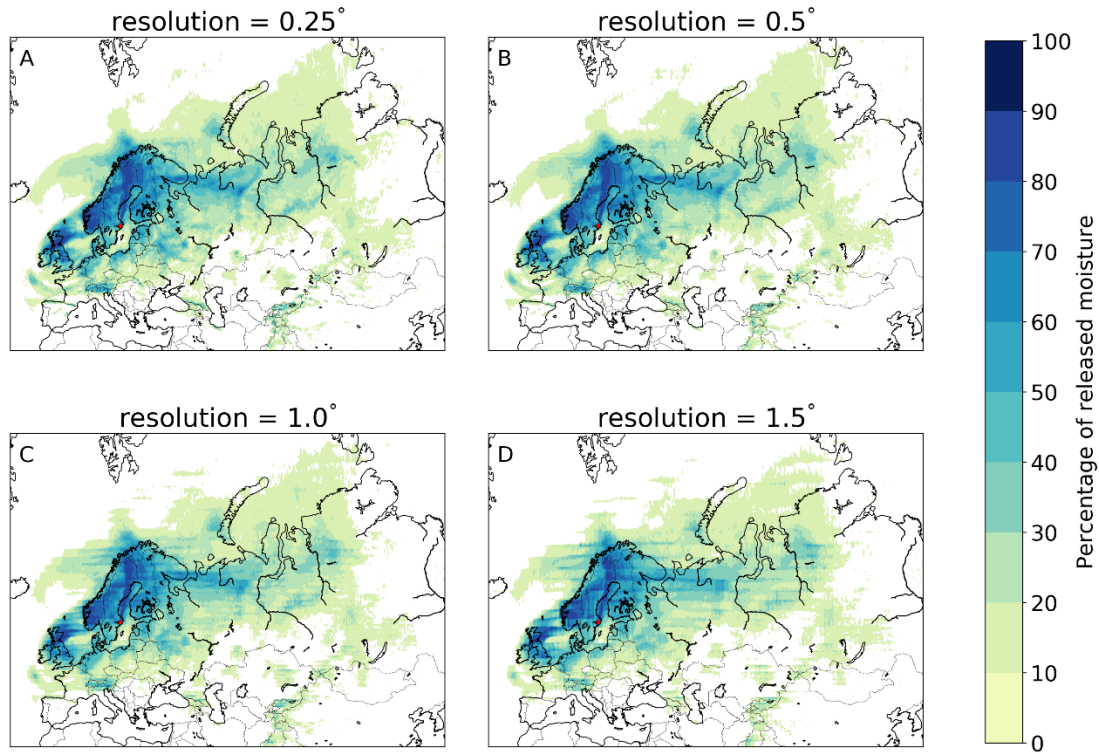

**Figure S36: Different footprints of moisture releases from Stockholm in July 2012 in a three-dimensional Lagrangian model with different horizontal resolutions. A) 0.25°, with a mean latitudinal moisture flow of 1.4° in a northerly direction and mean longitudinal flow of 11.0° in an easterly direction; B) 0.5°, with a mean latitudinal moisture flow of 1.6° in a northerly direction and mean longitudinal flow of 11.0° in an easterly direction; C) 1.0°, with a mean latitudinal moisture flow of 1.8° in a northerly direction and mean longitudinal flow of 10.9° in an easterly direction; D) 1.5°, with a mean latitudinal moisture flow of 2.1° in a northerly direction and mean longitudinal flow of 10.6° in an easterly direction.**

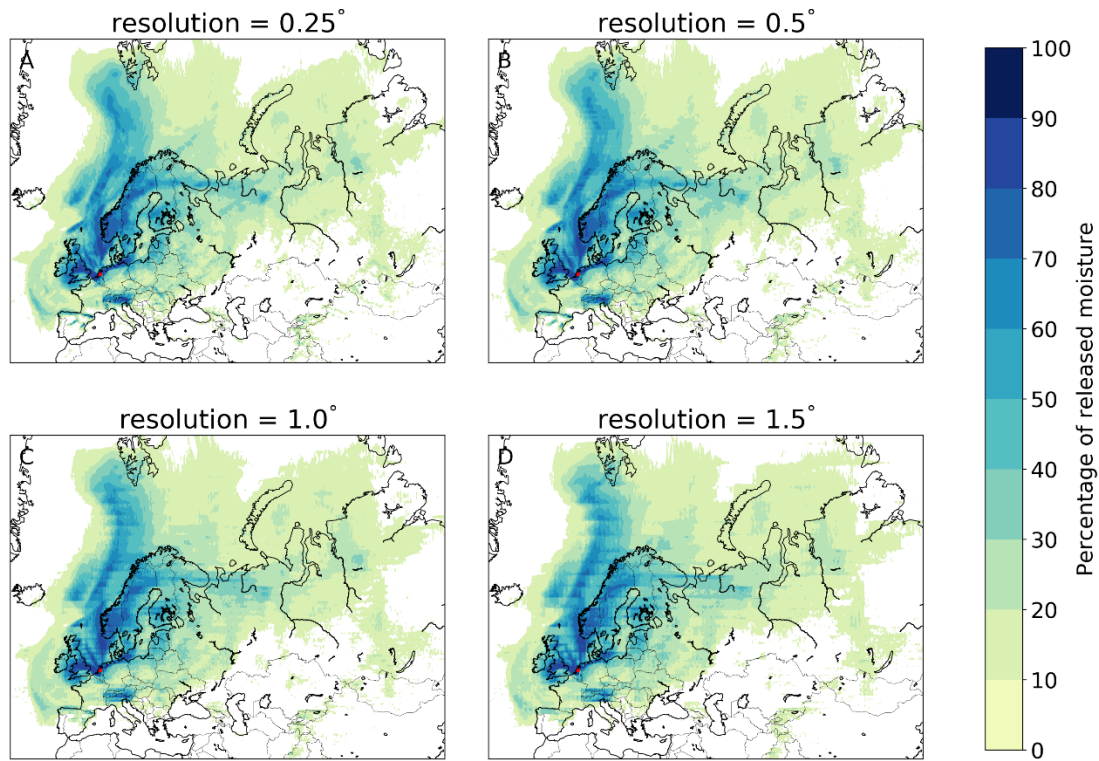

**Figure S37: Different footprints of moisture releases from Utrecht in July 2012 in a three-dimensional Lagrangian model with different horizontal resolutions. A) 0.25°, with a mean latitudinal moisture flow of 6.2° in a northerly direction and mean longitudinal flow of 15.4° in an easterly direction; B) 0.5°, with a mean latitudinal moisture flow of 6.2° in a northerly direction and mean longitudinal flow of 15.4° in an easterly direction; C) 1.0°, with a mean latitudinal moisture flow of 6.6° in a northerly direction and mean longitudinal flow of 15.4° in an easterly direction; D) 1.5°, with a mean latitudinal moisture flow of 6.6° in a northerly direction and mean longitudinal flow of 15.5° in an easterly direction.**

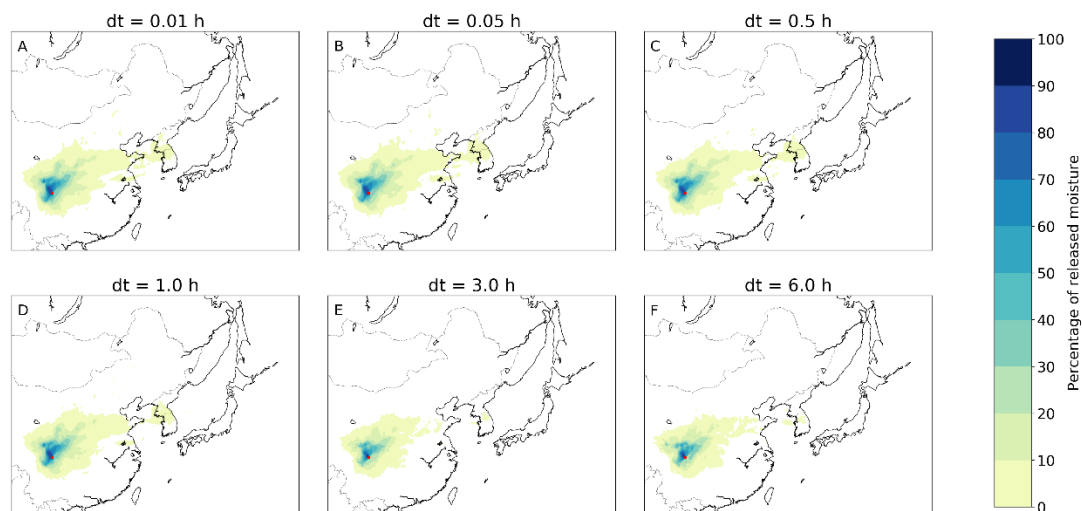

**Figure S38: Different footprints of moisture releases from Chengdu in July 2012 in a three-dimensional Lagrangian model with different time steps (dt): 0.01 hours, 0.05 hours, 0.5 hours, 1.0 hours, 3.0 hours, and 6.0 hours. A) 0.01 h, with a mean latitudinal moisture flow of  $2.3^\circ$  in a northerly direction and mean longitudinal flow of  $2.4^\circ$  in an easterly direction; B) 0.05 h, with a mean latitudinal moisture flow of  $2.3^\circ$  in a northerly direction and mean longitudinal flow of  $2.5^\circ$  in an easterly direction; C) 0.5 h, with a mean latitudinal moisture flow of  $2.2^\circ$  in a northerly direction and mean longitudinal flow of  $2.3^\circ$  in an easterly direction; D) 1.0 h, with a mean latitudinal moisture flow of  $2.2^\circ$  in a northerly direction and mean longitudinal flow of  $2.3^\circ$  in an easterly direction; E) 3.0 h, with a mean latitudinal moisture flow of  $1.8^\circ$  in a northerly direction and mean longitudinal flow of  $1.6^\circ$  in an easterly direction; F) 6.0 h, with a mean latitudinal moisture flow of  $1.9^\circ$  in a northerly direction and mean longitudinal flow of  $1.7^\circ$  in an easterly direction.**

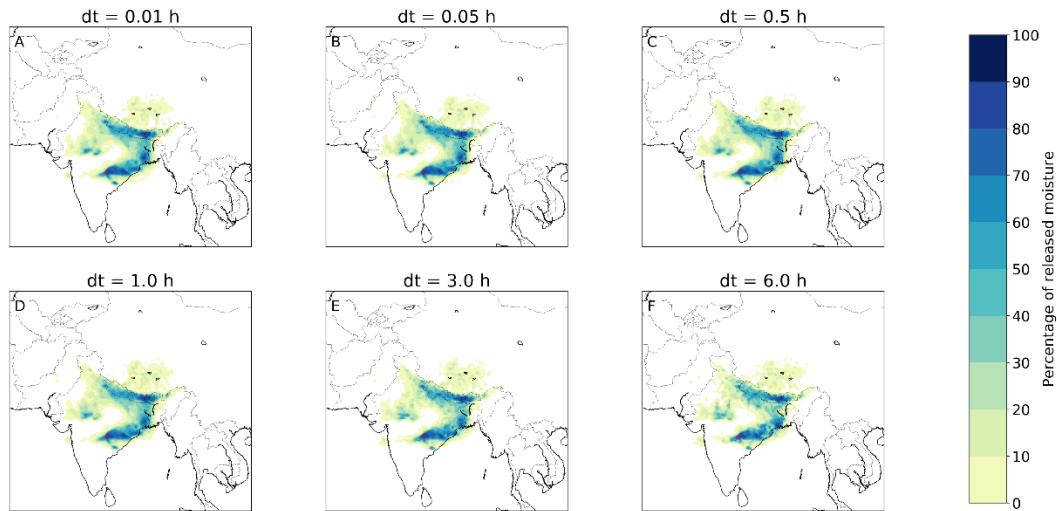

**Figure S39: Different footprints of moisture releases from Nagpur in July 2012 in a three-dimensional Lagrangian model with different time steps (dt): 0.01 hours, 0.05 hours, 0.5 hours, 1.0 hours, 3.0 hours, and 6.0 hours. A) 0.01 h, with a mean latitudinal moisture flow of  $4.9^\circ$  in a northerly direction and mean longitudinal flow of  $3.6^\circ$  in an easterly direction; B) 0.05 h, with a mean latitudinal moisture flow of  $4.9^\circ$  in a northerly direction and mean longitudinal flow of  $3.6^\circ$  in an easterly direction; C) 0.5 h, with a mean latitudinal moisture flow of  $4.9^\circ$  in a northerly direction and mean longitudinal flow of  $3.7^\circ$  in an easterly direction; D) 1.0 h, with a mean latitudinal moisture flow of  $4.9^\circ$  in a northerly direction and mean longitudinal flow of  $3.8^\circ$  in an easterly direction; E) 3.0 h, with a mean latitudinal moisture flow of  $4.8^\circ$  in a northerly direction and mean longitudinal flow of  $3.7^\circ$  in an easterly direction; F) 6.0 h, with a mean latitudinal moisture flow of  $4.7^\circ$  in a northerly direction and mean longitudinal flow of  $3.7^\circ$  in an easterly direction.**

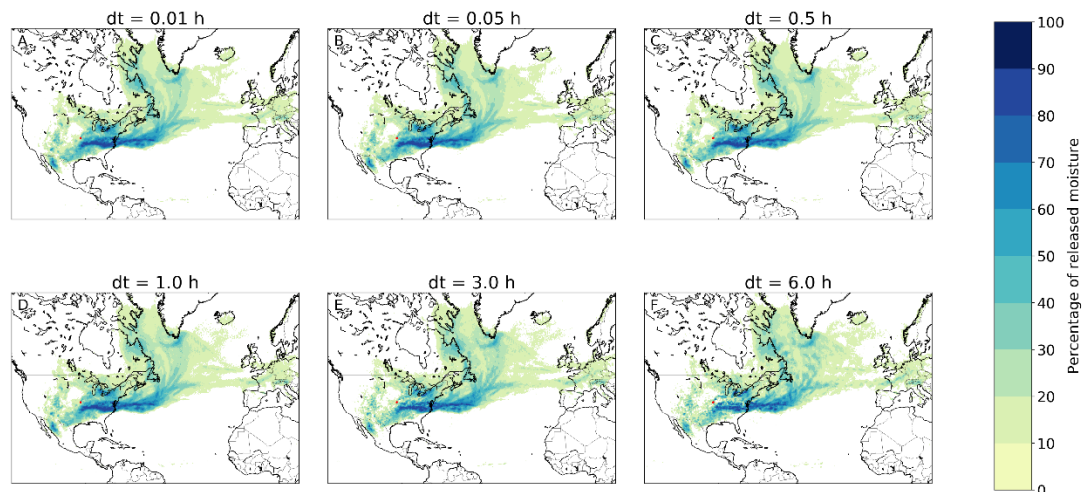

**Figure S40: Different footprints of moisture releases from Central Kansas in July 2012 in a three-dimensional Lagrangian model with different time steps (dt): 0.01 hours, 0.05 hours, 0.5 hours, 1.0 hours, 3.0 hours, and 6.0 hours. A) 0.01 h, with a mean latitudinal moisture flow of  $4.0^\circ$  in a northerly direction and mean longitudinal flow of  $15.3^\circ$  in an easterly direction; B) 0.05 h, with a mean latitudinal moisture flow of  $3.9^\circ$  in a northerly direction and mean longitudinal flow of  $15.3^\circ$  in an easterly direction; C) 0.5 h, with a mean latitudinal moisture flow of  $3.9^\circ$  in a northerly direction and mean longitudinal flow of  $15.3^\circ$  in an easterly direction; D) 1.0 h, with a mean latitudinal moisture flow of  $4.0^\circ$  in a northerly direction and mean longitudinal flow of  $15.3^\circ$  in an easterly direction; E) 3.0 h, with a mean latitudinal moisture flow of  $4.2^\circ$  in a northerly direction and mean longitudinal flow of  $16.1^\circ$  in an easterly direction; F) 6.0 h, with a mean latitudinal moisture flow of  $4.5^\circ$  in a northerly direction and mean longitudinal flow of  $16.7^\circ$  in an easterly direction.**



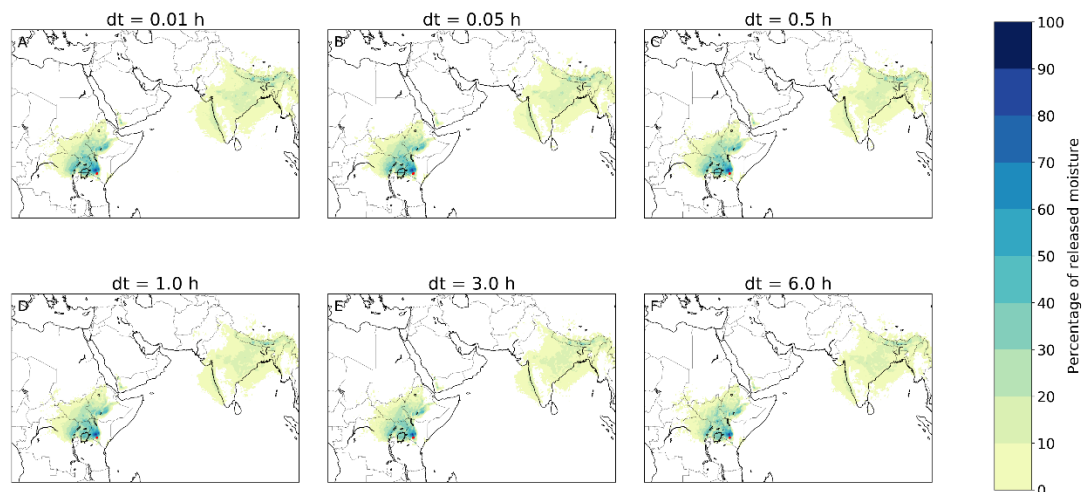

**Figure S41: Different footprints of moisture releases from Nairobi in July 2012 in a three-dimensional Lagrangian model with different time steps (dt): 0.01 hours, 0.05 hours, 0.5 hours, 1.0 hours, 3.0 hours, and 6.0 hours. A) 0.01 h, with a mean latitudinal moisture flow of  $7.4^\circ$  in a northerly direction and mean longitudinal flow of  $3.2^\circ$  in an easterly direction; B) 0.05 h, with a mean latitudinal moisture flow of  $7.2^\circ$  in a northerly direction and mean longitudinal flow of  $3.0^\circ$  in an easterly direction; C) 0.5 h, with a mean latitudinal moisture flow of  $7.1^\circ$  in a northerly direction and mean longitudinal flow of  $2.8^\circ$  in an easterly direction; D) 1.0 h, with a mean latitudinal moisture flow of  $6.9^\circ$  in a northerly direction and mean longitudinal flow of  $2.5^\circ$  in an easterly direction; E) 3.0 h, with a mean latitudinal moisture flow of  $6.6^\circ$  in a northerly direction and mean longitudinal flow of  $2.5^\circ$  in an easterly direction; F) 6.0 h, with a mean latitudinal moisture flow of  $6.6^\circ$  in a northerly direction and mean longitudinal flow of  $2.5^\circ$  in an easterly direction.**



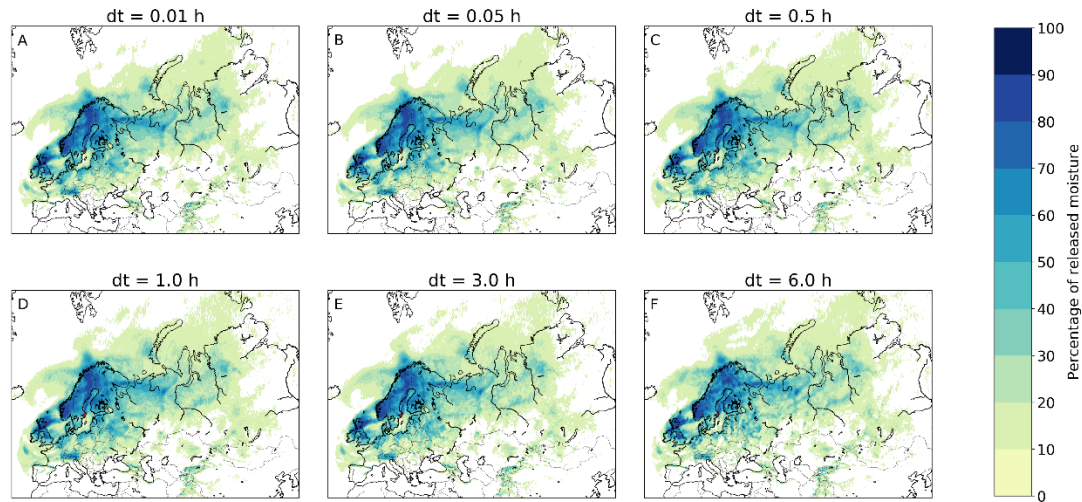

**Figure S42: Different footprints of moisture releases from Stockholm in July 2012 in a three-dimensional Lagrangian model with different time steps (dt): 0.01 hours, 0.05 hours, 0.5 hours, 1.0 hours, 3.0 hours, and 6.0 hours. A) 0.01 h, with a mean latitudinal moisture flow of  $1.3^\circ$  in a northerly direction and mean longitudinal flow of  $11.0^\circ$  in an easterly direction; B) 0.05 h, with a mean latitudinal moisture flow of  $1.3^\circ$  in a northerly direction and mean longitudinal flow of  $11.1^\circ$  in an easterly direction; C) 0.5 h, with a mean latitudinal moisture flow of  $1.1^\circ$  in a northerly direction and mean longitudinal flow of  $11.1^\circ$  in an easterly direction; D) 1.0 h, with a mean latitudinal moisture flow of  $0.8^\circ$  in a northerly direction and mean longitudinal flow of  $11.2^\circ$  in an easterly direction; E) 3.0 h, with a mean latitudinal moisture flow of  $1.1^\circ$  in a northerly direction and mean longitudinal flow of  $11.0^\circ$  in an easterly direction; F) 3.0 h, with a mean latitudinal moisture flow of  $1.4^\circ$  in a northerly direction and mean longitudinal flow of  $11.5^\circ$  in an easterly direction.**

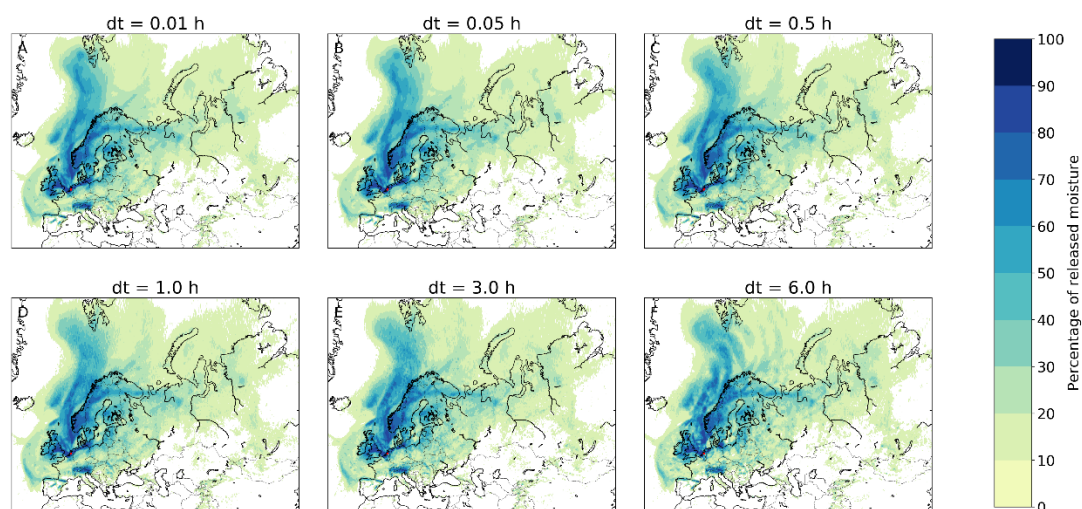

**Figure S43: Different footprints of moisture releases from Utrecht in July 2012 in a three-dimensional Lagrangian model with different time steps (dt): 0.01 hours, 0.05 hours, 0.5 hours, 1.0 hours, 3.0 hours, and 6.0 hours. A) 0.01 h, with a mean latitudinal moisture flow of  $6.2^\circ$  in a northerly direction and mean longitudinal flow of  $15.3^\circ$  in an easterly direction; B) 0.05 h, with a mean latitudinal moisture flow of  $6.1^\circ$  in a northerly direction and mean longitudinal flow of  $15.3^\circ$  in an easterly direction; C) 0.5 h, with a mean latitudinal moisture flow of  $5.9^\circ$  in a northerly direction and mean longitudinal flow of  $15.3^\circ$  in an easterly direction; D) 1.0 h, with a mean latitudinal moisture flow of  $5.9^\circ$  in a northerly direction and mean longitudinal flow of  $15.2^\circ$  in an easterly direction; E) 3.0 h, with a mean latitudinal moisture flow of  $6.1^\circ$  in a northerly direction and mean longitudinal flow of  $15.6^\circ$  in an easterly direction; F) 6.0 h, with a mean latitudinal moisture flow of  $6.7^\circ$  in a northerly direction and mean longitudinal flow of  $15.9^\circ$  in an easterly direction.**

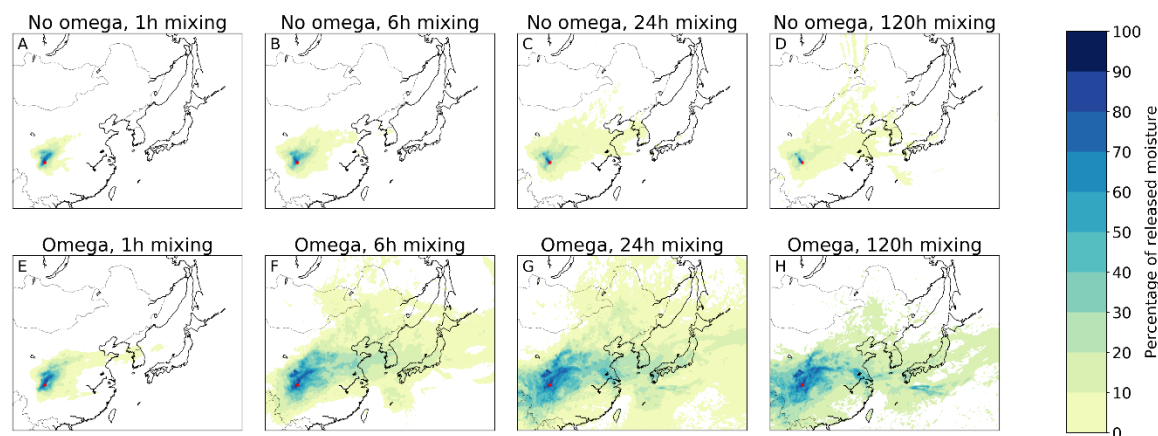

**Figure S44: Different footprints of moisture releases from Chengdu in July 2012 in a three-dimensional Lagrangian model with different mixing assumptions: without and with accounting for the three-dimensional moisture flows in the ERA5 data (termed omega), and with different assumptions of additional vertical mixing speed (full mixing every 1 h, every 6 h, every 24 h, and every 120 h). A) Without omega, every 1 h mixing, with a mean latitudinal moisture flow of  $1.6^\circ$  in a northerly direction and mean longitudinal flow of  $1.3^\circ$  in an easterly direction; B) Without omega, every 6 h mixing, with a mean latitudinal moisture flow of  $1.8^\circ$  in a northerly direction and mean longitudinal flow of  $1.7^\circ$  in an easterly direction; C) Without omega, every 24 h mixing, with a mean latitudinal moisture flow of  $2.0^\circ$  in a northerly direction and mean longitudinal flow of  $1.8^\circ$  in an easterly direction; D) Without omega, every 120 h mixing, with a mean latitudinal moisture flow of  $2.0^\circ$  in a northerly direction and mean longitudinal flow of  $1.6^\circ$  in an easterly direction; E) With omega, every 1 h mixing, with a mean latitudinal moisture flow of  $2.4^\circ$  in a northerly direction and mean longitudinal flow of  $3.1^\circ$  in an easterly direction; F) With omega, every 6 h mixing, with a mean latitudinal moisture flow of  $3.8^\circ$  in a northerly direction and mean longitudinal flow of  $7.1^\circ$  in an easterly direction; G) With omega, every 24 h mixing, with a mean latitudinal moisture flow of  $1.5^\circ$  in a northerly direction and mean longitudinal flow of  $3.8^\circ$  in an easterly direction; H) With omega, every 120 h mixing, with a mean latitudinal moisture flow of  $0.6^\circ$  in a southerly direction and mean longitudinal flow of  $1.0^\circ$  in an easterly direction.**

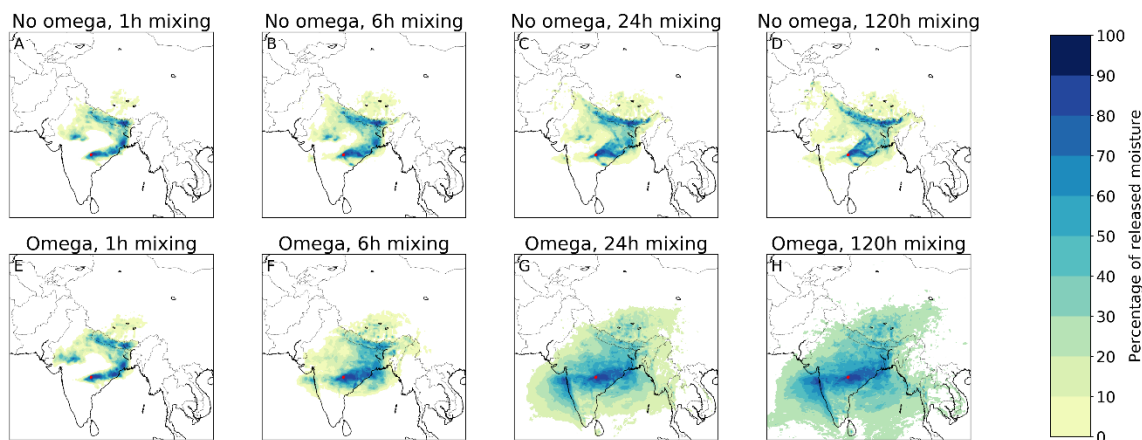

**Figure S45: Different footprints of moisture releases from Nagpur in July 2012 in a three-dimensional Lagrangian model with different mixing assumptions: without and with accounting for the three-dimensional moisture flows in the ERA5 data (termed omega), and with different assumptions of additional vertical mixing speed (full mixing every 1 h, every 6 h, every 24 h, and every 120 h). A) Without omega, every 1 h mixing, with a mean latitudinal moisture flow of  $4.9^\circ$  in a northerly direction and mean longitudinal flow of  $3.4^\circ$  in an easterly direction; B) Without omega, every 6 h mixing, with a mean latitudinal moisture flow of  $4.7^\circ$  in a northerly direction and mean longitudinal flow of  $3.6^\circ$  in an easterly direction; C) Without omega, every 24 h mixing, with a mean latitudinal moisture flow of  $4.6^\circ$  in a northerly direction and mean longitudinal flow of  $3.8^\circ$  in an easterly direction; D) Without omega, every 120 h mixing, with a mean latitudinal moisture flow of  $4.5^\circ$  in a northerly direction and mean longitudinal flow of  $3.9^\circ$  in an easterly direction; E) With omega, every 1 h mixing, with a mean latitudinal moisture flow of  $4.6^\circ$  in a northerly direction and mean longitudinal flow of  $3.4^\circ$  in an easterly direction; F) With omega, every 6 h mixing, with a mean latitudinal moisture flow of  $2.7^\circ$  in a northerly direction and mean longitudinal flow of  $3.9^\circ$  in an easterly direction; G) With omega, every 24 h mixing, with a mean latitudinal moisture flow of  $1.1^\circ$  in a southerly direction and mean longitudinal flow of  $1.1^\circ$  in a westerly direction; H) With omega, every 120 h mixing, with a mean latitudinal moisture flow of  $3.7^\circ$  in a southerly direction and mean longitudinal flow of  $0.5^\circ$  in a westerly direction.**

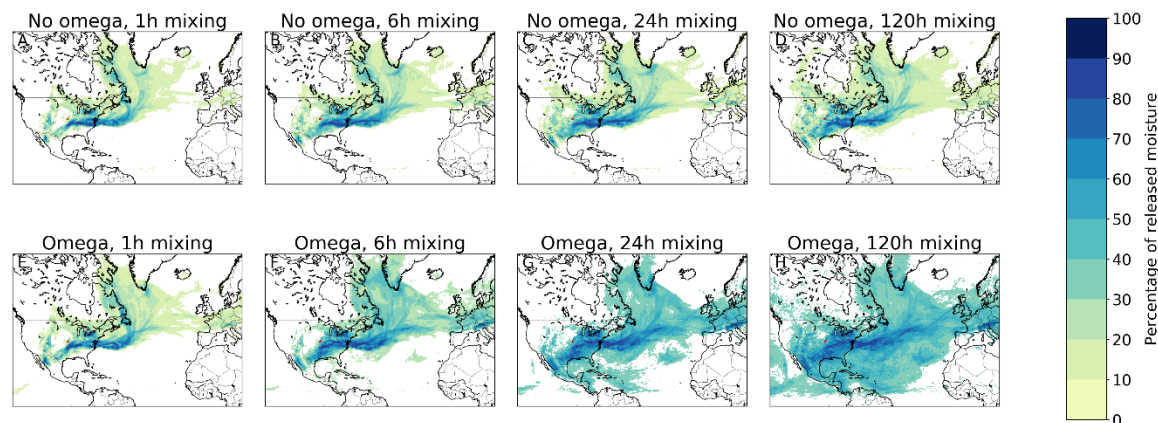

**Figure S46: Different footprints of moisture releases from Central Kansas in July 2012 in a three-dimensional Lagrangian model with different mixing assumptions: without and with accounting for the three-dimensional moisture flows in the ERA5 data (termed omega), and with different assumptions of additional vertical mixing speed (full mixing every 1 h, every 6 h, every 24 h, and every 120 h). A) Without omega, every 1 h mixing, with a mean latitudinal moisture flow of  $4.3^\circ$  in a northerly direction and mean longitudinal flow of  $16.4^\circ$  in an easterly direction; B) Without omega, every 6 h mixing, with a mean latitudinal moisture flow of  $4.1^\circ$  in a northerly direction and mean longitudinal flow of  $15.6^\circ$  in an easterly direction; C) Without omega, every 24 h mixing, with a mean latitudinal moisture flow of  $3.7^\circ$  in a northerly direction and mean longitudinal flow of  $14.6^\circ$  in an easterly direction; D) Without omega, every 120 h mixing, with a mean latitudinal moisture flow of  $3.3^\circ$  in a northerly direction and mean longitudinal flow of  $13.4^\circ$  in an easterly direction; E) With omega, every 1 h mixing, with a mean latitudinal moisture flow of  $4.0^\circ$  in a northerly direction and mean longitudinal flow of  $15.4^\circ$  in an easterly direction; F) With omega, every 6 h mixing, with a mean latitudinal moisture flow of  $5.1^\circ$  in a northerly direction and mean longitudinal flow of  $12.5^\circ$  in an easterly direction; G) With omega, every 24 h mixing, with a mean latitudinal moisture flow of  $2.3^\circ$  in a northerly direction and mean longitudinal flow of  $9.2^\circ$  in an easterly direction; H) With omega, every 120 h mixing, with a mean latitudinal moisture flow of  $1.1^\circ$  in a southerly direction and mean longitudinal flow of  $6.0^\circ$  in an easterly direction.**

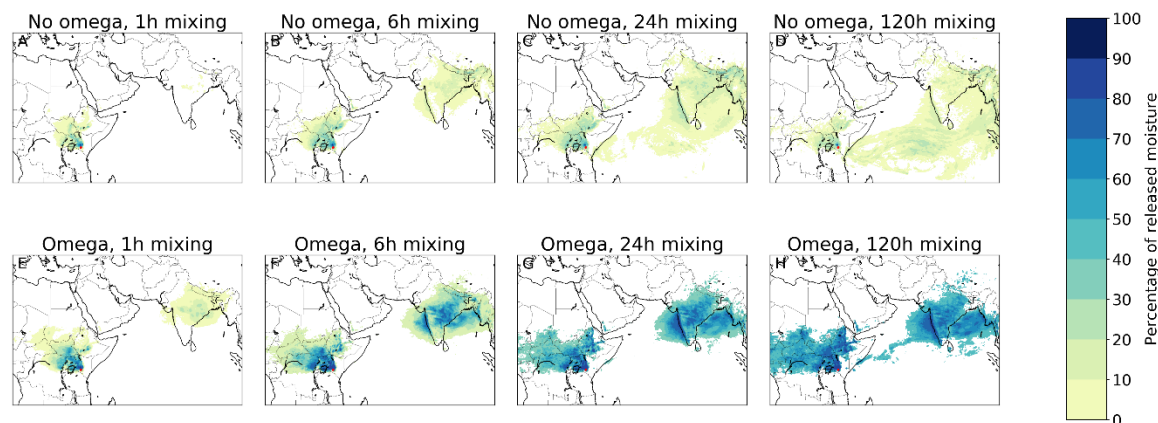

**Figure S47: Different footprints of moisture releases from Nairobi in July 2012 in a three-dimensional Lagrangian model with different mixing assumptions: without and with accounting for the three-dimensional moisture flows in the ERA5 data (termed omega), and with different assumptions of additional vertical mixing speed (full mixing every 1 h, every 6 h, every 24 h, and every 120 h). A) Without omega, every 1 h mixing, with a mean latitudinal moisture flow of  $3.5^\circ$  in a northerly direction and mean longitudinal flow of  $0.9^\circ$  in a westerly direction; B) Without omega, every 6 h mixing, with a mean latitudinal moisture flow of  $6.5^\circ$  in a northerly direction and mean longitudinal flow of  $2.8^\circ$  in an easterly direction; C) Without omega, every 24 h mixing, with a mean latitudinal moisture flow of  $6.5^\circ$  in a northerly direction and mean longitudinal flow of  $5.3^\circ$  in an easterly direction; D) Without omega, every 120 h mixing, with a mean latitudinal moisture flow of  $3.6^\circ$  in a northerly direction and mean longitudinal flow of  $5.4^\circ$  in an easterly direction; E) With omega, every 1 h mixing, with a mean latitudinal moisture flow of  $6.9^\circ$  in a northerly direction and mean longitudinal flow of  $0.1^\circ$  in an easterly direction; F) With omega, every 6 h mixing, with a mean latitudinal moisture flow of  $12.9^\circ$  in a northerly direction and mean longitudinal flow of  $9.5^\circ$  in an easterly direction; G) With omega, every 24 h mixing, with a mean latitudinal moisture flow of  $12.5^\circ$  in a northerly direction and mean longitudinal flow of  $10.2^\circ$  in an easterly direction; H) With omega, every 120 h mixing, with a mean latitudinal moisture flow of  $11.0^\circ$  in a northerly direction and mean longitudinal flow of  $8.8^\circ$  in an easterly direction.**



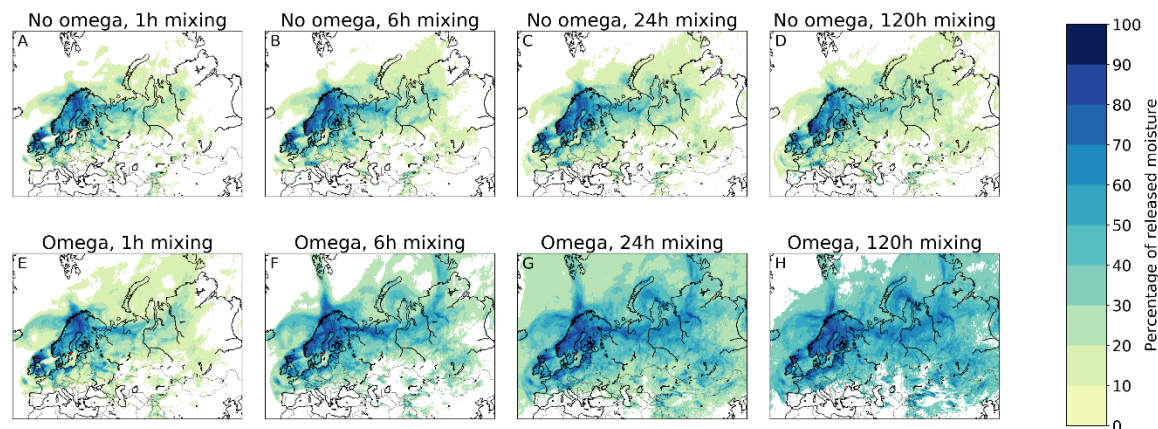

**Figure S48: Different footprints of moisture releases from Stockholm in July 2012 in a three-dimensional Lagrangian model with different mixing assumptions: without and with accounting for the three-dimensional moisture flows in the ERA5 data (termed omega), and with different assumptions of additional vertical mixing speed (full mixing every 1 h, every 6 h, every 24 h, and every 120 h). A) Without omega, every 1 h mixing, with a mean latitudinal moisture flow of  $1.5^\circ$  in a northerly direction and mean longitudinal flow of  $11.8^\circ$  in an easterly direction; B) Without omega, every 6 h mixing, with a mean latitudinal moisture flow of  $1.5^\circ$  in a northerly direction and mean longitudinal flow of  $11.0^\circ$  in an easterly direction; C) Without omega, every 24 h mixing, with a mean latitudinal moisture flow of  $1.0^\circ$  in a northerly direction and mean longitudinal flow of  $10.1^\circ$  in an easterly direction; D) Without omega, every 120 h mixing, with a mean latitudinal moisture flow of  $0.4^\circ$  in a northerly direction and mean longitudinal flow of  $8.3^\circ$  in an easterly direction; E) With omega, every 1 h mixing, with a mean latitudinal moisture flow of  $1.3^\circ$  in a northerly direction and mean longitudinal flow of  $12.6^\circ$  in an easterly direction; F) With omega, every 6 h mixing, with a mean latitudinal moisture flow of  $1.2^\circ$  in a northerly direction and mean longitudinal flow of  $13.6^\circ$  in an easterly direction; G) With omega, every 24 h mixing, with a mean latitudinal moisture flow of  $0.0^\circ$  in northerly/a southerly direction and mean longitudinal flow of  $14.2^\circ$  in an easterly direction; H) With omega, every 120 h mixing, with a mean latitudinal moisture flow of  $0.8^\circ$  in a southerly direction and mean longitudinal flow of  $14.2^\circ$  in an easterly direction.**

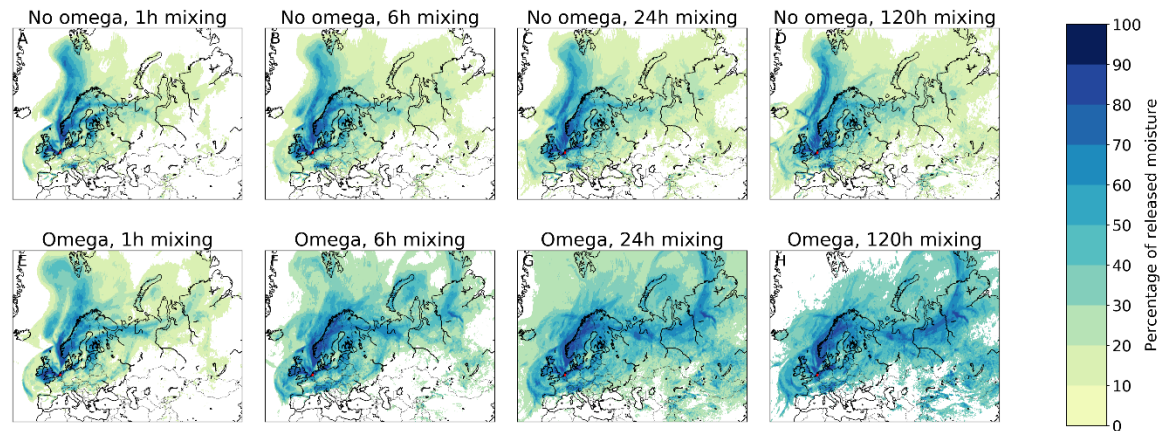

**Figure S49: Different footprints of moisture releases from Utrecht in July 2012 in a three-dimensional Lagrangian model with different mixing assumptions: without and with accounting for the three-dimensional moisture flows in the ERA5 data (termed omega), and with different assumptions of additional vertical mixing speed (full mixing every 1 h, every 6 h, every 24 h, and every 120 h). A) Without omega, every 1 h mixing, with a mean latitudinal moisture flow of  $8.1^{\circ}$  in a northerly direction and mean longitudinal flow of  $14.9^{\circ}$  in an easterly direction; B) Without omega, every 6 h mixing, with a mean latitudinal moisture flow of  $6.3^{\circ}$  in a northerly direction and mean longitudinal flow of  $15.4^{\circ}$  in an easterly direction; C) Without omega, every 24 h mixing, with a mean latitudinal moisture flow of  $4.7^{\circ}$  in a northerly direction and mean longitudinal flow of  $15.5^{\circ}$  in an easterly direction; D) Without omega, every 120 h mixing, with a mean latitudinal moisture flow of  $3.6^{\circ}$  in a northerly direction and mean longitudinal flow of  $15.6^{\circ}$  in an easterly direction; E) With omega, every 1 h mixing, with a mean latitudinal moisture flow of  $8.8^{\circ}$  in a northerly direction and mean longitudinal flow of  $17.5^{\circ}$  in an easterly direction; F) With omega, every 6 h mixing, with a mean latitudinal moisture flow of  $6.2^{\circ}$  in a northerly direction and mean longitudinal flow of  $17.9^{\circ}$  in an easterly direction; G) With omega, every 24 h mixing, with a mean latitudinal moisture flow of  $4.4^{\circ}$  in a northerly direction and mean longitudinal flow of  $18.1^{\circ}$  in an easterly direction; H) With omega, every 120 h mixing, with a mean latitudinal moisture flow of  $3.9^{\circ}$  in a northerly direction and mean longitudinal flow of  $18.4^{\circ}$  in an easterly direction.**
